# Supplementary material for: FinDerS(+): Real-Time Earthquake Slip Profiles and Magnitudes Estimated from Backprojected Displacement with Consideration of Fault Source Maturity Gradient
Source: Frontiers journal article supplement (doi:10.3389/feart.2021.685879), 2021-08-04

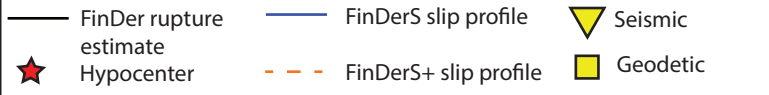

15 s:  $M_{FD} 6.5$  |  $L_{FD} = 29$  km

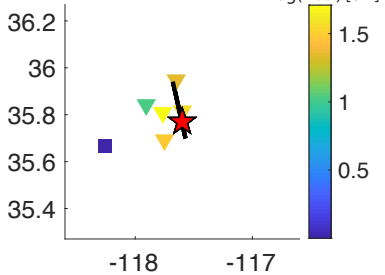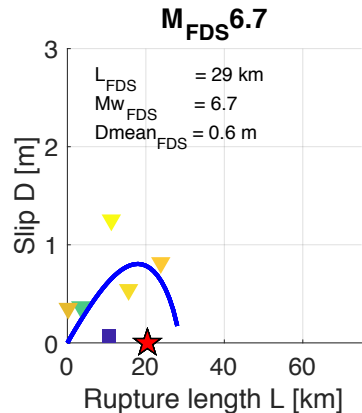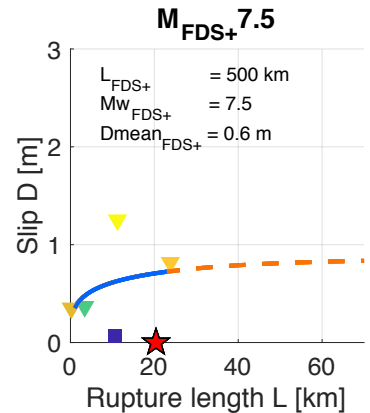

20 s:  $M_{FD} 6.8$  |  $L_{FD} = 45$  km

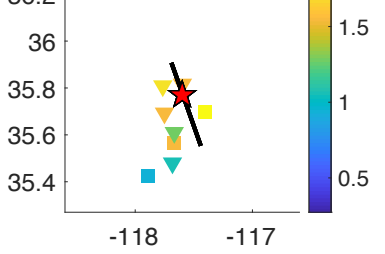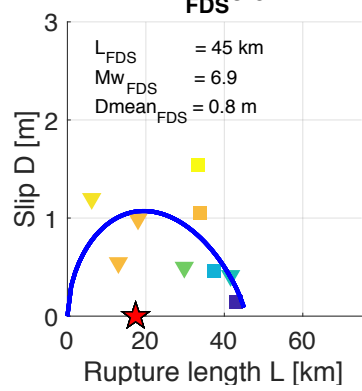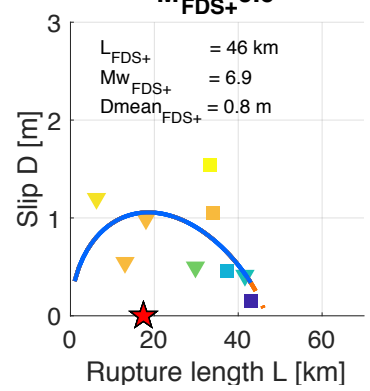

25 s:  $M_{FD} 6.8$  |  $L_{FD} = 45$  km

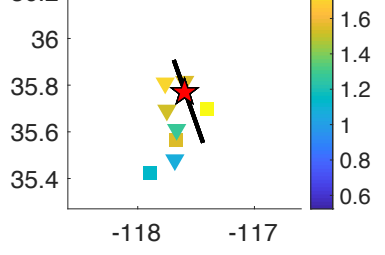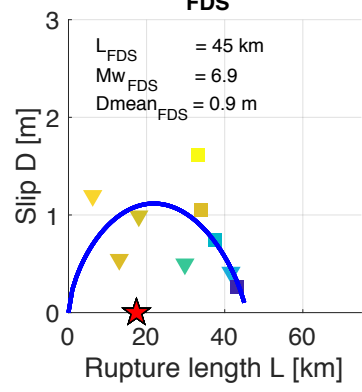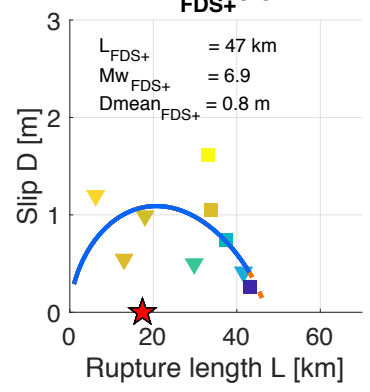

30 s:  $M_{FD} 6.9$  |  $L_{FD} = 53$  km

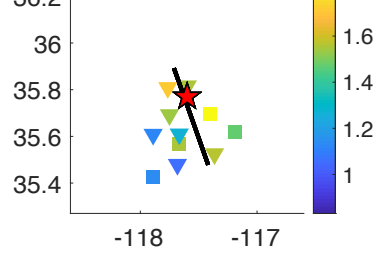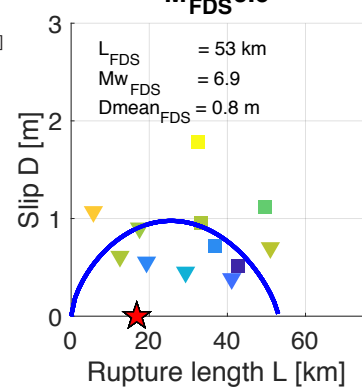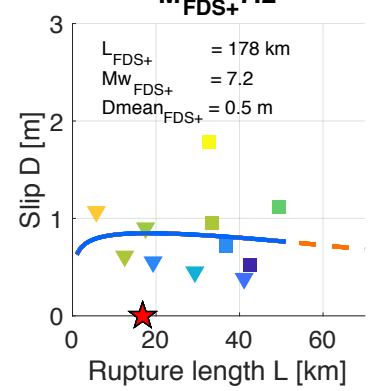

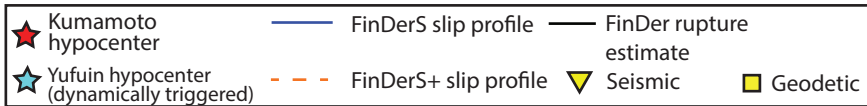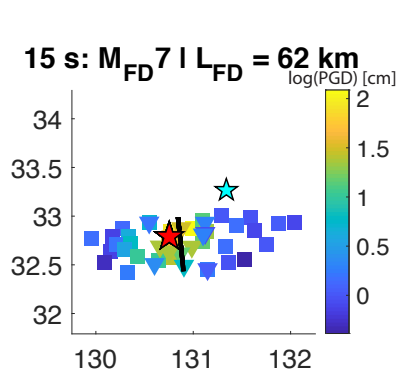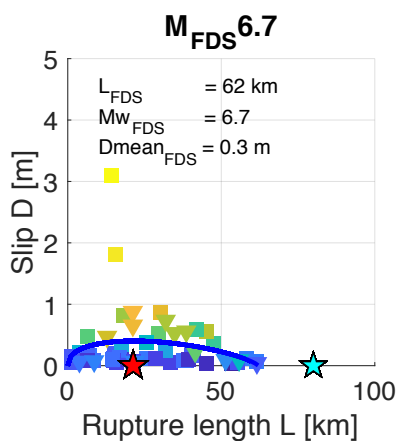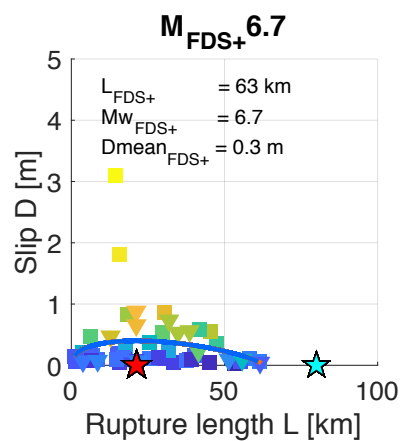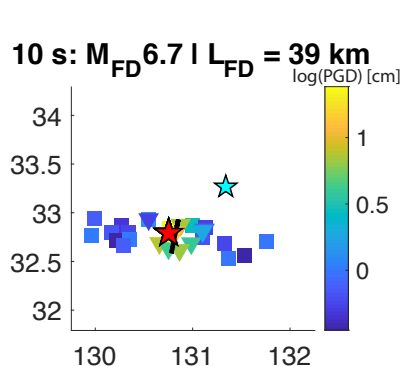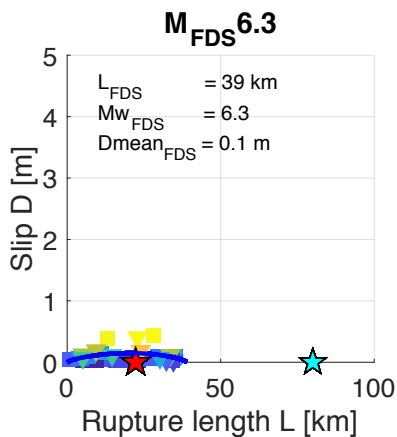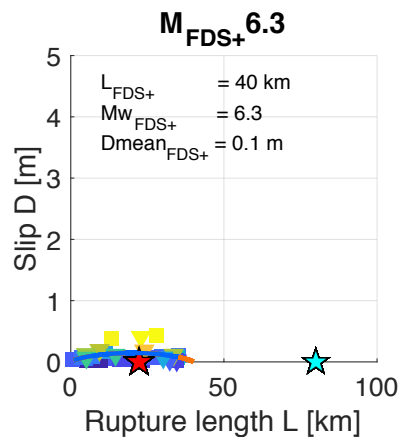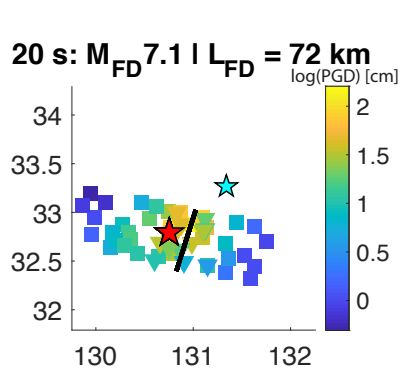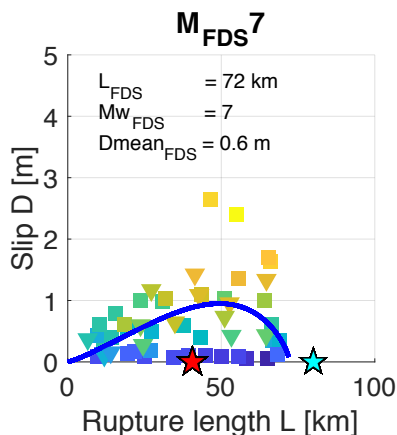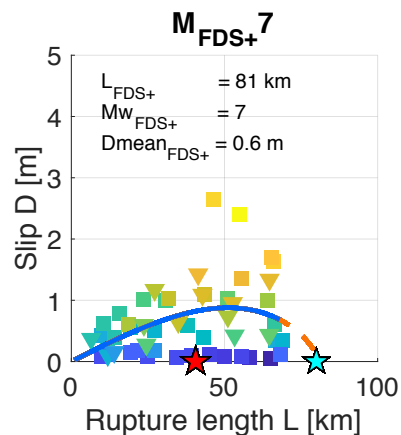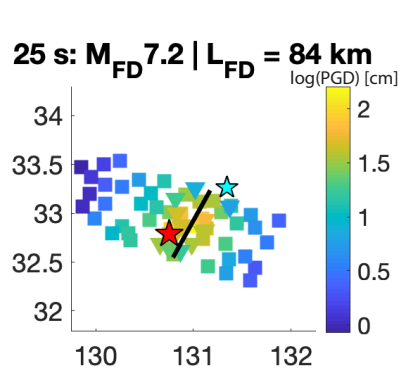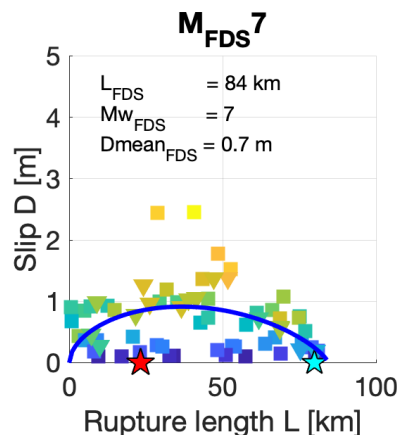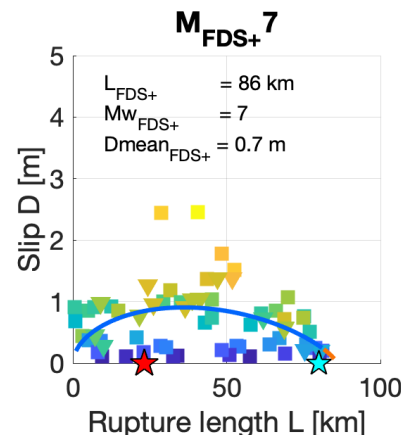

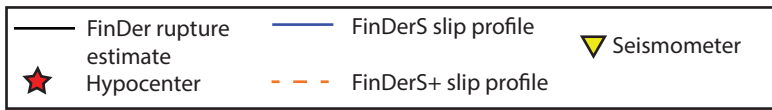

40 s:  $M_{FD} 7.6$  |  $L_{FD} = 157$  km

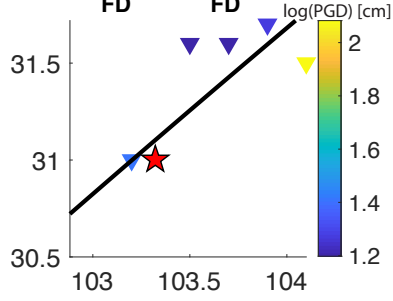

$M_{FDS} 7.3$

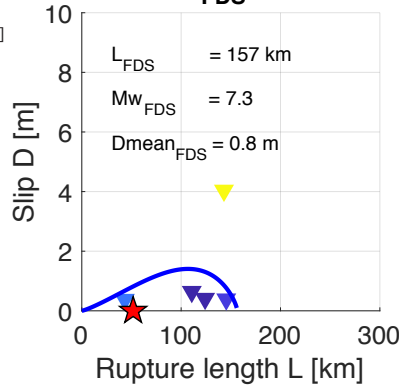

$M_{FDS+} 7.8$

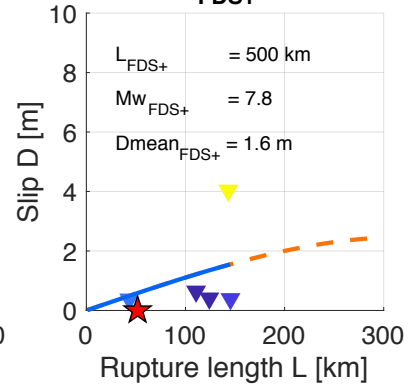

65 s:  $M_{FD} 7.8$  |  $L_{FD} = 213$  km

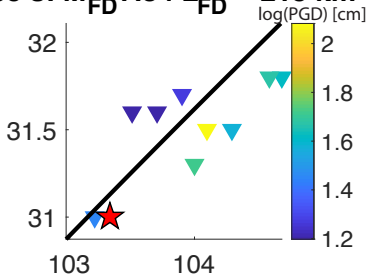

$M_{FDS} 7.4$

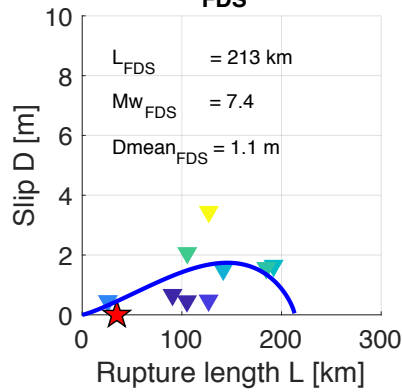

$M_{FDS+} 7.5$

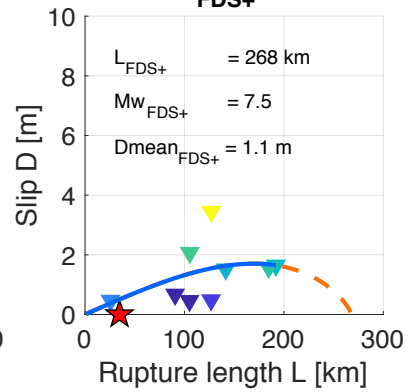

90 s:  $M_{FD} 7.9$  |  $L_{FD} = 249$  km

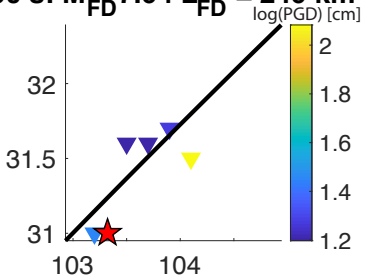

$M_{FDS} 7.5$

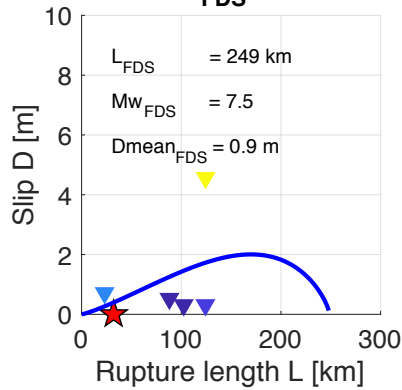

$M_{FDS+} 7.9$

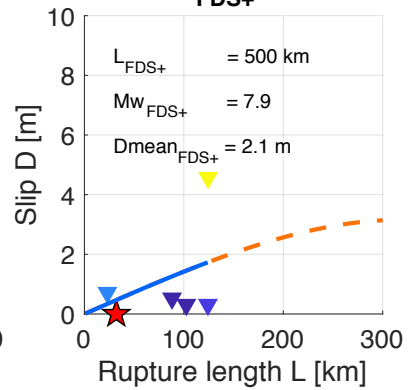

110 s:  $M_{FD} 8$  |  $L_{FD} = 290$  km

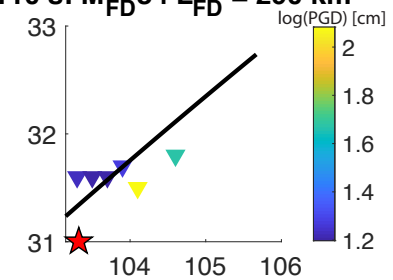

$M_{FDS} 7.7$

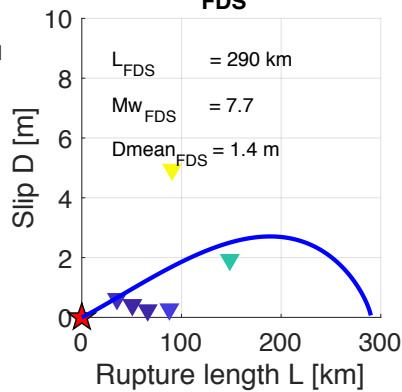

$M_{FDS+} 7.7$

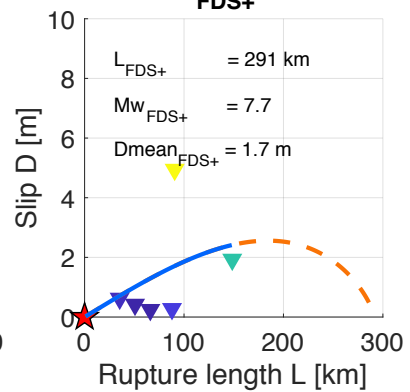

Supplement: Presentation_1.zip [file Presentation_1.zip]
