# Supplementary material for: FinDerS(+): Real-Time Earthquake Slip Profiles and Magnitudes Estimated from Backprojected Displacement with Consideration of Fault Source Maturity Gradient
Source: Frontiers journal article supplement (doi:10.3389/feart.2021.685879), 2021-08-04
Supplement: Presentation_1.zip [file Presentation_1.zip]

| Name       | Origin time<br><br>[UTC] | Latitude<br><br>[degrees] | Longitude<br><br>[degrees] | Depth<br><br>[km] | M <sub>w</sub> | approx. rupture length and duration<br><br>[km]<br>[s] | Source mechanism     | Final FinDer line-source parameters<br><ul style="list-style-type: none"> <li>time from origin [s]</li> <li>length [km]</li> <li>strike [degrees]</li> <li>lat1/lon1</li> <li>lat2/lon2</li> </ul> |
|------------|--------------------------|---------------------------|----------------------------|-------------------|----------------|--------------------------------------------------------|----------------------|----------------------------------------------------------------------------------------------------------------------------------------------------------------------------------------------------|
| Ridgecrest | 2019-07-06 03:19:53      | 35.770                    | -117.599                   | 8                 | 7.1            | 50<br>20                                               | strike-slip          | <ul style="list-style-type: none"> <li>26</li> <li>53</li> <li>145</li> <li>35.92/-117.73</li> <li>35.53/-117.40</li> </ul>                                                                        |
| Kumamoto   | 2016-04-15 16:25:06      | 32.791                    | 130.754                    | 10                | 7.0            | 40 (65)<br>15                                          | strike-slip & normal | <ul style="list-style-type: none"> <li>36</li> <li>85</li> <li>30</li> <li>32.61/130.81</li> <li>33.27/131.26</li> </ul>                                                                           |
| Yufuin*    | 2016-04-15 16:25:39      | 33.266                    | 131.340                    | 5                 | 5.7-6.5        |                                                        | normal & strike-slip |                                                                                                                                                                                                    |
| Wenchuan   | 2008-05-12 06:28:01      | 31.002                    | 103.322                    | 19                | 7.9            | 300<br>100                                             | thrust & strike-slip | <ul style="list-style-type: none"> <li>124</li> <li>290</li> <li>50</li> <li>31.24/103.33</li> <li>32.92/105.69</li> </ul>                                                                         |
