# Supplementary material for: FinDerS(+): Real-Time Earthquake Slip Profiles and Magnitudes Estimated from Backprojected Displacement with Consideration of Fault Source Maturity Gradient
Source: Frontiers journal article supplement (doi:10.3389/feart.2021.685879), 2021-08-04
Supplement: Presentation_1.zip [file Presentation_1.zip]

a.

| Time from origin<br>[s] | Moment Rate | FinDer<br>(current line-source) |                        | FinDerS<br>(current slip profile) |           | FinDerS+<br>(predicted slip profile) |                   |            | PGD scaling ( $M_{PGD}$ ) |                            |                    |                           |                  |                         |
|-------------------------|-------------|---------------------------------|------------------------|-----------------------------------|-----------|--------------------------------------|-------------------|------------|---------------------------|----------------------------|--------------------|---------------------------|------------------|-------------------------|
|                         | $M_{sr}$    | $L_{FD}$<br>[km]                | $M_{FD}$               | $D_{mean}$<br>[m]                 | $M_{FDS}$ | $L_{FDS+}$<br>[km]                   | $D_{mean}$<br>[m] | $M_{FDS+}$ | $M_{PGD}^{Crowell}$       | $M_{PGD}^{Crowell}_{GNSS}$ | $M_{PGD}^{Melgar}$ | $M_{PGD}^{Melgar}_{GNSS}$ | $M_{PGD}^{Ruhl}$ | $M_{PGD}^{Ruhl}_{GNSS}$ |
| 5                       | 6.1         | (first solution at 8s)          | (first solution at 8s) | -                                 | -         | -                                    | -                 | -          | 5.4                       | -                          | 5.4                | -                         | 5.0              | -                       |
| 10                      | 6.8         | 7                               | 5.6                    | -                                 | -         | -                                    | -                 | -          | 6.0                       | 6.2                        | 5.9                | 6.1                       | 5.7              | 5.8                     |
| 15                      | 6.9         | 29                              | 6.5                    | 0.5                               | 6.6       | 30                                   | 0.4               | 6.6        | 6.5                       | 6.7                        | 6.5                | 6.7                       | 6.3              | 6.5                     |
| 20                      | 7.0         | 45                              | 6.8                    | 0.7                               | 6.8       | 75                                   | 0.6               | 6.9        | 6.6                       | 6.8                        | 6.6                | 6.8                       | 6.4              | 6.6                     |
| 25                      | 7.0         | 45                              | 6.8                    | 0.8                               | 6.9       | 91                                   | 0.6               | 7.0        | 6.7                       | 6.8                        | 6.6                | 6.8                       | 6.4              | 6.6                     |
| 30                      | 7.0         | 53                              | 6.9                    | 0.8                               | 6.9       | 239                                  | 0.5               | 7.3        | 6.8                       | 6.9                        | 6.7                | 6.9                       | 6.4              | 6.7                     |
