# Supplementary material for: FinDerS(+): Real-Time Earthquake Slip Profiles and Magnitudes Estimated from Backprojected Displacement with Consideration of Fault Source Maturity Gradient
Source: Frontiers journal article supplement (doi:10.3389/feart.2021.685879), 2021-08-04
Supplement: Presentation_1.zip [file Presentation_1.zip]

c.

| Time from origin | Moment Rate | FinDer (current line-source) |                         | FinDerS (current slip profile) |                   | FinDerS+ (predicted slip profile) |                    |                   | PGD scaling ( $M_{PGD}$ ) |                  |                 |               |
|------------------|-------------|------------------------------|-------------------------|--------------------------------|-------------------|-----------------------------------|--------------------|-------------------|---------------------------|------------------|-----------------|---------------|
|                  |             | $M_{mr}$                     | $L_{FD}$<br>[km]        | $M_{FD}$                       | $D_{mean}$<br>[m] | $M_{FDS}$                         | $L_{FDS+}$<br>[km] | $D_{mean}$<br>[m] | $M_{FDS+}$                | $MPGD^{Crowell}$ | $MPGD^{Melgar}$ | $MPGD^{Ruhl}$ |
| [s]              |             |                              |                         |                                |                   |                                   |                    |                   |                           |                  |                 |               |
| 5                | 6.8         | (first solution at 13s)      | (first solution at 13s) | -                              | -                 | -                                 | -                  | -                 | -                         | 5.9              | 5.9             | 5.6           |
| 10               | 6.9         | (first solution at 13s)      | (first solution at 13s) | -                              | -                 | -                                 | -                  | -                 | -                         | 6.1              | 6.2             | 5.9           |
| 15               | 7.1         | 39                           | 6.7                     | -                              | -                 | -                                 | -                  | -                 | -                         | 6.3              | 6.4             | 6.1           |
| 20               | 7.3         | 62                           | 7.0                     | 0.4                            | 7.0               | 90                                | 0.3                | 6.8               | 6.7                       | 6.6              | 6.3             | 6.3           |
| 25               | 7.5         | 99                           | 7.3                     | 0.5                            | 6.9               | 100                               | 0.4                | 6.9               | 6.8                       | 6.7              | 6.4             | 6.4           |
| 30               | 7.6         | 134                          | 7.5                     | 0.7                            | 7.2               | 145                               | 0.7                | 7.2               | 6.9                       | 6.7              | 6.5             | 6.5           |
| 35               | 7.7         | 134                          | 7.5                     | 0.8                            | 7.2               | 150                               | 0.8                | 7.2               | 6.9                       | 6.8              | 6.6             | 6.6           |
| 40               | 7.7         | 157                          | 7.6                     | 1.0                            | 7.3               | 195                               | 1.0                | 7.4               | 7.0                       | 6.8              | 6.6             | 6.6           |
| 45               | 7.7         | 157                          | 7.6                     | 1.1                            | 7.3               | 500                               | 1.0                | 7.7               | 7.0                       | 6.9              | 6.7             | 6.7           |
| 50               | 7.7         | 183                          | 7.7                     | 1.3                            | 7.4               | 500                               | 1.0                | 7.7               | 7.2                       | 7.0              | 6.8             | 6.8           |
| 55               | 7.8         | 183                          | 7.7                     | 1.3                            | 7.4               | 500                               | 1.1                | 7.7               | 7.2                       | 7.1              | 6.9             | 6.9           |
| 60               | 7.8         | 183                          | 7.7                     | 1.4                            | 7.4               | 500                               | 1.0                | 7.7               | 7.2                       | 7.1              | 6.9             | 6.9           |
| 65               | 7.8         | 213                          | 7.8                     | 1.4                            | 7.5               | 500                               | 1.2                | 7.7               | 7.2                       | 7.1              | 6.9             | 6.9           |
| 70               | 7.8         | 213                          | 7.8                     | 1.4                            | 7.5               | 500                               | 1.1                | 7.7               | 7.2                       | 7.1              | 6.9             | 6.9           |
| 75               | 7.8         | 213                          | 7.8                     | 1.4                            | 7.5               | 500                               | 1.1                | 7.7               | 7.2                       | 7.1              | 6.9             | 6.9           |
| 80               | 7.9         | 213                          | 7.8                     | 1.4                            | 7.5               | 500                               | 1.2                | 7.7               | 7.2                       | 7.1              | 6.9             | 6.9           |
| 85               | 7.9         | 213                          | 7.8                     | 1.5                            | 7.5               | 500                               | 1.3                | 7.7               | 7.2                       | 7.1              | 6.9             | 6.9           |
| 90               | 7.9         | 249                          | 7.9                     | 1.4                            | 7.5               | 263                               | 1.3                | 7.6               | 7.3                       | 7.1              | 6.9             | 6.9           |
| 95               | 7.9         | 249                          | 7.9                     | 1.3                            | 7.5               | 276                               | 1.2                | 7.6               | 7.3                       | 7.1              | 6.9             | 6.9           |
| 100              | 7.9         | 290                          | 8.0                     | 1.3                            | 7.6               | 423                               | 1.1                | 7.6               | 7.3                       | 7.2              | 7.0             | 7.0           |
| 105              | 7.9         | 290                          | 8.0                     | 1.4                            | 7.6               | 446                               | 1.1                | 7.7               | 7.3                       | 7.2              | 7.0             | 7.0           |
| 110              | 7.9         | 290                          | 8.0                     | 1.5                            | 7.6               | 323                               | 1.3                | 7.6               | 7.3                       | 7.2              | 7.0             | 7.0           |
| 115              | 7.9         | 290                          | 8.0                     | 1.5                            | 7.6               | 323                               | 1.3                | 7.6               | 7.3                       | 7.2              | 7.0             | 7.0           |
| 120              | 7.9         | 290                          | 8.0                     | 1.5                            | 7.6               | 323                               | 1.3                | 7.6               | 7.3                       | 7.2              | 7.0             | 7.0           |
