# Supplementary material for: FinDerS(+): Real-Time Earthquake Slip Profiles and Magnitudes Estimated from Backprojected Displacement with Consideration of Fault Source Maturity Gradient
Source: Frontiers journal article supplement (doi:10.3389/feart.2021.685879), 2021-08-04
Supplement: Presentation_1.zip [file Presentation_1.zip]

b.

| Time from origin [s] | Moment Rate | FinDer (current line-source) |          | FinDerS (current slip profile) |           | FinDerS+ (predicted slip profile) |            |            | PGD scaling ( $M_{PGD}$ ) |                           |                    |                          |                  |                        |
|----------------------|-------------|------------------------------|----------|--------------------------------|-----------|-----------------------------------|------------|------------|---------------------------|---------------------------|--------------------|--------------------------|------------------|------------------------|
|                      |             | $L_{FD}$                     | $M_{FD}$ | $D_{mean}$                     | $M_{FDS}$ | $L_{FDS+}$                        | $D_{mean}$ | $M_{FDS+}$ | $M_{PGD}^{Crowell}$       | $M_{PGD}^{Crowell, GNSS}$ | $M_{PGD}^{Melgar}$ | $M_{PGD}^{Melgar, GNSS}$ | $M_{PGD}^{Ruhl}$ | $M_{PGD}^{Ruhl, GNSS}$ |
|                      |             | [km]                         |          | [m]                            |           | [km]                              | [m]        |            |                           |                           |                    |                          |                  |                        |
| 5                    | 6.6         | 5                            | 5.4      | 0.1                            | 5.4       | -                                 | -          | -          | 5.4                       | 4.9                       | 5.4                | 4.5                      | 5.0              | 4.2                    |
| 10                   | 6.9         | 39                           | 6.7      | 0.1                            | 6.2       | 40                                | 0.1        | 6.3        | 6.0                       | 6.0                       | 5.9                | 5.8                      | 5.7              | 5.5                    |
| 15                   | 7.0         | 62                           | 7.0      | 0.3                            | 6.7       | 63                                | 0.3        | 6.7        | 6.5                       | 6.6                       | 6.5                | 6.6                      | 6.3              | 6.4                    |
| 20                   | 7.0         | 72                           | 7.1      | 0.5                            | 6.9       | 81                                | 0.5        | 6.9        | 6.6                       | 6.8                       | 6.6                | 6.7                      | 6.4              | 6.5                    |
| 25                   | 7.1         | 84                           | 7.2      | 0.6                            | 7.0       | 87                                | 0.6        | 7.0        | 6.7                       | 6.8                       | 6.6                | 6.8                      | 6.4              | 6.5                    |
| 30                   | 7.1         | 84                           | 7.2      | 0.7                            | 7.0       | 94                                | 0.7        | 7.1        | 6.8                       | 6.9                       | 6.7                | 6.8                      | 6.4              | 6.6                    |
| 35                   | 7.1         | 84                           | 7.2      | 0.8                            | 7.1       | 92                                | 0.7        | 7.1        | 6.8                       | 6.9                       | 6.7                | 6.8                      | 6.5              | 6.6                    |
| 40                   | 7.1         | 84                           | 7.2      | 0.8                            | 7.1       | 101                               | 0.7        | 7.1        | 6.8                       | 6.9                       | 6.7                | 6.8                      | 6.5              | 6.6                    |
