# Supplementary material for: FinDerS(+): Real-Time Earthquake Slip Profiles and Magnitudes Estimated from Backprojected Displacement with Consideration of Fault Source Maturity Gradient
Source: Frontiers journal article supplement (doi:10.3389/feart.2021.685879), 2021-08-04
Supplement: Table_1.XLSX [file Table_1.XLSX]

## Sheet: Ridgecrest seismic
Station name	Station Latitude	Station Longitude	Distance to hypocenter	Distance along FinDer line- source	Closest distance to FinDer line-source	PGD1	PGD2	D
HN% channels			[km]	[km]	[km]	[cm]	[cm]	[cm]
CI.CCC	35.52	-117.36	35.5	44.3	3.2	41.8	31.1	78.7
CI.CLC	35.82	-117.6	9.5	5.8	4.4	44.1	33.8	94.1
CI.TOW2	35.81	-117.76	17.4	0	8.7	51.8	47.3	158.6
CI.WRC2	35.95	-117.65	21.8	0	12.6	23.6	22.1	91.5
CI.Q0072	35.61	-117.67	20.5	21	13.9	21.4	17.8	88.4
CI.SRT	35.69	-117.75	18	9.1	14.8	43.3	30.8	186.9
CI.WVP2	35.95	-117.82	29.1	0	18.1	15.3	11.2	76.3
CI.JRC2	35.98	-117.81	31.2	0	20.3	14.3	11.7	77.4
CI.WNM	35.84	-117.91	29.8	0	20.9	11.5	10.3	63.6
CI.WCS2	36.03	-117.77	33	0	22.6	12.7	10.3	74
CI.LRL	35.48	-117.68	34.1	32	23.3	13.3	11.6	79.4
CI.WRV2	36.01	-117.89	38	0	27.3	11.9	8.5	79.6
CI.MPM	36.06	-117.49	34.5	0	29.8	15.4	12.7	110.4
CI.WBM	35.61	-117.89	32.8	9.5	30.5	15.2	11.7	110.7
CI.SLA	35.89	-117.28	32.6	15.1	32.4	22	21.1	167.7
CI.WMF	36.12	-117.85	45.7	0	35.3	9.9	8	80.7
CI.APL	35.34	-116.87	81.5	53.1	43.5	7.4	6.5	70.3
CI.HAR	35.01	-117.3	89	53.1	48.3	7.4	6.9	75.7
CI.DAW	36.27	-117.59	56.3	0	49	4.2	3.8	44
CI.DTP	35.27	-117.85	60.7	42.8	49	6.4	5.8	66.8
CI.GSC	35.3	-116.81	89.1	53.1	50.8	7.9	6.2	84.7
CI.WBS	35.54	-118.14	55.9	3	53.6	8	6.5	89.5
CI.WOR	35.7	-118.24	59.1	0	53.6	4.7	3.9	52
CI.WHF	35.7	-118.35	68.8	0	63.1	4	3.8	51.1
CI.LMR2	34.93	-117.7	93.7	53.1	65.4	2.7	2.6	35.3
CI.HYS	34.87	-117.57	101	53.1	67.7	3.6	3	47.6
CI.Q0068	35.11	-117.98	81.2	50.2	68.7	5.9	4.9	78.9
CI.CCA	35.15	-118.02	78.7	44.4	69	6.7	5.8	90.8
CI.Q0056	34.84	-117.15	111.5	53.1	69.4	5.9	5.2	80.8
CI.RRX	34.88	-117	113.8	53.1	70.4	8	6.8	110.6
CI.ISA	35.66	-118.47	80.2	0	74.7	3.4	3.2	48.8
CI.CWC	36.44	-118.08	86.4	0	76.4	5.7	4.2	83.2
CI.AVM	35.07	-116.62	119	53.1	77.9	6.5	4.8	96.2
CI.CGO	36.55	-117.8	89	0	80.3	3.8	3.6	58.4
CI.WAS2	35.74	-118.56	86.8	0	80.4	2.7	2.3	40.6
CI.EDW2	34.88	-117.99	105.4	53.1	86.5	3.8	3.3	61.3

## Sheet: Ridgecrest geodetic
Station name	Station Latitude	Station Longitude	Distance to hypocenter	Distance along FinDer line- source	Closest distance to FinDer line-source	PGD1	PGD2	D
			[km]	[km]	[km]	[cm]	[cm]	[cm]
PB.P595	35.7	-117.4	21.1	26.6	11.3	75	66.4	269.6
PB.P593	35.39	-117.21	56.1	53.1	13.6	14.3	11.1	58.2
PB.CCCC	35.57	-117.67	25	24.8	17	35.9	34.5	171.1
PB.P580	35.62	-117.19	41.2	44.5	22	30.7	29.3	175.7
PB.P592	35.24	-117.3	65.4	53.1	23.1	14.6	10.4	86.2
PB.RAMT	35.34	-117.68	49.2	44.8	32.4	13.9	13.3	106
PB.BEPK	35.88	-118.07	45.1	0	36.4	13.9	13.3	115.4
PB.P616	35.42	-117.89	47.4	26	42.5	14	10.3	130.8
PB.P570	35.67	-118.26	61.2	0	56.1	9.6	8.2	111
PB.P568	35.25	-118.13	75	29.3	70.7	10.3	7.8	141.7

## Sheet: Kumamoto seismic
Station name	Station Latitude	Station Longitude	Distance to hypocenter	Distance along FinDer line- source	Closest distance to FinDer line-source	PGD1	PGD2	D
			[km]	[km]	[km]	[cm]	[cm]	[cm]
KM.M011	32.62	130.87	20.5	3.5	4	17.6	12.5	36.2
OI.TH11	33.28	131.21	73.1	84	5.1	17.8	12.6	40.6
KM.MH14	32.63	130.75	16.5	0	6.2	23.1	16.3	58.3
KM.M004	32.93	131.12	40.3	45.8	7.2	61.9	43.8	169.9
KM.M001	33.12	131.07	50.9	61.6	7.5	35.1	24.8	98.2
OI.T009	33.26	131.34	78.6	84.5	7.7	27.6	19.5	78.4
KM.MH02	33.12	131.06	50.7	61.4	8	35.5	25.1	103.4
KM.M005	32.88	130.88	20.1	29	9.4	44.8	31.7	143.6
KM.MH16	32.8	130.82	12.4	18.7	9.7	44.9	31.8	146.4
KM.M009	32.69	130.99	24.4	15.7	9.9	34.9	24.7	115.8
KM.MH06	32.81	131.1	33.9	33.2	12.3	39.5	27.9	150.5
KM.M006	32.79	130.78	11	16.4	12.9	50.6	35.8	199.6
KM.M007	32.83	131.12	36.2	35.7	13.2	38.5	27.2	153.6
KM.MH09	32.49	130.9	33.6	0	15.8	8.5	6	38.4
KM.M008	32.69	130.66	15.7	0.7	16.8	32.5	23	153.2
OI.T006	33.42	131.31	91.1	84.5	18.3	12.3	8.7	61.4
OI.T008	33.26	131.02	61.6	72.2	18.9	13.3	9.4	68.3
KM.MH03	33	130.83	29.7	38.6	20	45.7	32.3	244.3
OI.T012	33.07	131.37	67.7	70.5	20.1	24.5	17.3	131.2
KM.M012	32.51	130.6	32.6	0	22.4	10.3	7.3	59.7
KM.M014	32.4	130.83	41.3	0	23.6	5	3.6	30.3
OI.T005	33.45	131.11	85.1	84.5	25.1	7.3	5.2	46
OI.TH01	33.41	131.03	78	84.5	26.8	5.7	4	37.6
OI.T015	32.97	131.4	65	62.6	27.3	15.3	10.8	102.5
FK.O014	33.15	130.82	45.4	52.6	29.3	19.1	13.5	134.8
KM.M010	32.61	130.49	31.7	0	30.2	8.2	5.8	59.5
OI.T010	33.23	131.59	94.6	84.5	31	26	18.4	191.5
KM.M002	33.02	130.68	31.9	33.8	32.9	10.6	7.5	81.8
OI.T002	33.57	131.27	102.5	84.5	33.7	6.4	4.5	50.4
MY.Z001	32.71	131.31	52.5	32.7	35	23.8	16.8	192
MY.Z020	32.46	131.15	50	1.1	35.8	11	7.8	90.6
OI.T003	33.56	131.45	110.2	84.5	36.7	10.5	7.4	87.9
OI.T007	33.42	131.61	108.9	84.5	36.8	15.8	11.2	132.2
KM.MH01	33.11	130.69	41.2	43	37	9.7	6.9	81.7
FK.OH10	33.29	130.82	60.5	66	37.1	10.6	7.5	89.2
FK.OH06	33.59	131.13	99.9	84.5	38.2	5.4	3.8	46.8
KM.M013	32.37	130.51	50.1	0	39	5.6	4	49.1
KM.M003	32.93	130.55	30.1	19.3	39.3	9.5	6.7	83.7
KM.M017	32.26	130.93	58.1	0	40.6	6.4	4.5	57.3
KM.MH11	32.29	130.58	54.9	0	41.3	3	2.1	27.3
FK.O012	33.33	130.79	65	69.1	41.4	7.3	5.2	67
KM.MH13	32.22	130.91	61.4	0	44	4.9	3.5	47.5
KM.MH12	32.21	130.74	61.6	0	45.2	4.1	2.9	39.9
OI.TH03	33.47	131.69	118	84.5	45.6	14.9	10.5	146.6
KM.M016	32.2	130.78	62.5	0	45.8	5	3.5	49.5
OI.TH08	32.84	131.54	73.8	56.2	45.9	8.5	6	83.9
FK.OH08	33.47	130.83	79.9	83.6	46	4.6	3.2	45.4
KM.M018	32.39	130.39	54	0	46.1	3.7	2.6	36.3
MY.ZH04	32.52	131.33	60.6	16	47.6	15	10.6	153.1
NG.S012	32.79	130.35	40.4	0	47.8	12.3	8.7	126.1
MY.ZH05	32.35	131.27	66.1	0	51.7	6.9	4.9	74.8
FK.O016	33.02	130.45	42.6	22.6	52	4.9	3.5	53.5
FK.O013	33.23	130.56	56.5	48	54.3	5.9	4.2	66.1
OI.T001	33.68	131.59	129	84.5	55.2	12.3	8.7	140.7
FK.OH07	33.37	130.64	69.9	65.3	56.1	6.4	4.5	73.6
FK.O010	33.42	130.67	75.5	72.2	56.5	6	4.2	69.4
FK.O004	33.74	131.01	112.2	84.5	57.6	4.5	3.2	52.7
KM.M015	32.22	130.4	69.1	0	57.8	4.4	3.1	52.1
NG.S014	32.61	130.18	57.3	0	58.6	5.1	3.6	61.1
NG.S011	32.78	130.2	53.5	0	60.1	7.7	5.5	93.9
KM.M019	32.45	130.18	64.6	0	61.4	2.6	1.9	32.7
MY.Z009	32.05	130.81	79.2	0	62.4	6.2	4.4	77.1
FK.O015	33.16	130.41	57.2	34.8	63.4	6.6	4.7	83.5
KM.MH15	32.17	130.36	75.3	0	64.1	3.8	2.7	48.7
KG.S003	32.06	130.59	79.7	0	64.8	3.3	2.3	42.4
MY.Z002	32.7	131.68	87.1	49.6	65.7	17	12	220.7
KM.MH10	32.32	130.18	73.7	0	67.4	2.2	1.6	29.2
OI.TH10	32.93	131.87	106	80.5	67.8	4.8	3.4	64.5
OI.T016	32.97	131.9	110	84.5	67.9	4.5	3.2	60.1
NG.S008	32.92	130.18	58.1	1.5	68.2	7.1	5.1	95.7
MY.Z010	32	130.97	86.7	0	69.6	3.5	2.5	47.4
MY.Z003	32.57	131.66	87.3	35.9	71.2	19.1	13.5	264
KG.S002	32.09	130.35	83.5	0	71.7	2.8	2	39.4
FK.OH01	33.88	130.98	127.6	84.5	73.6	3.8	2.7	53.4
FK.OH03	33.56	130.55	92.3	80	73.7	5.1	3.6	71.9
SA.GH04	33.37	130.4	76.3	54.5	74.6	3.6	2.5	51.1
KG.S001	32.19	130.18	83.5	0	75.1	1.4	1	19.7
MY.ZH15	32.37	131.59	89.4	13.3	76.8	10.2	7.2	149.8
SA.G007	33.26	130.3	71.8	39.7	77.4	6.5	4.6	96.2
MY.ZH16	32.51	131.7	92.4	31.8	77.5	15.1	10.7	223
KG.SH03	31.98	130.44	91.2	0	77.7	1.9	1.4	28.7
MY.Z008	32.11	131.39	93.6	0	78.1	5.8	4.1	86.6
NG.S009	32.85	130.02	70.8	0	78.3	6.8	4.8	101.8
KG.S006	31.91	130.7	94.6	0	78.7	3.4	2.4	51
MY.ZH10	32.02	131.29	95.6	0	79.2	5	3.6	75.6
MY.Z011	32	131.26	96.6	0	79.9	3.6	2.5	54
KM.M021	32.38	130	83.3	0	80.1	2	1.4	30.5
EH.MH13	33.37	132.12	144.2	84.5	80.2	10.3	7.3	155.8
MY.Z006	32.26	131.56	93.6	1.5	80.5	7.7	5.5	117.4
MY.ZH08	32.21	131.53	94.4	0	80.6	8	5.6	121.4
FK.O002	33.83	130.71	119.6	84.5	80.9	4.3	3.1	65.9
YM.G012	33.99	131.22	144.4	84.5	81.1	6	4.3	92.3
KG.SH01	32.16	130.12	90.3	0	82.1	1.7	1.2	26.9
SA.G008	33.1	130.1	73.8	15.1	85	8.2	5.8	130.5
KG.S005	31.9	130.45	99.5	0	85.5	2.4	1.7	38.8
NG.S019	32.9	129.96	77.7	0	86	7.2	5.1	116
KM.M022	32.19	130.03	93.4	0	86.7	1.7	1.2	27.1
KG.SH05	31.87	130.5	101.6	0	87.2	2.9	2.1	47.5
KG.S004	32.01	130.19	98.4	0	87.8	2.6	1.8	42.5
NG.S010	32.74	129.88	83.6	0	88.5	3.6	2.5	58.9
SA.GH05	33.18	130.1	78.3	22.8	88.8	7.2	5.1	118.2
NG.SH06	32.7	129.86	85.1	0	89.3	3.3	2.3	54.6

## Sheet: Kumamoto geodetic
Station name	Station Latitude	Station Longitude	Distance to hypocenter	Distance along FinDer line- source	Closest distance to FinDer line-source	PGD1	PGD2	D
			[km]	[km]	[km]	[cm]	[cm]	[cm]
833	33.13	131.21	57.3	68.7	3.2	42.3	32.1	80.4
702	32.58	130.79	26.1	0	3.7	30.2	29.8	60.3
703	32.95	131.09	37.7	46.3	3.9	93.2	72.4	190.5
472	33.25	131.35	76.2	84.5	8	26.5	22.8	77.2
699	33.12	131.06	47.8	61.4	8	49	42.6	142.8
1071	32.71	130.75	13.5	6.9	10.6	36.1	27.6	125.1
707	33.27	131.12	64.1	78.4	11.6	23	19.1	84.2
704	32.85	131.13	37.2	37.9	12.9	53	45.8	208.8
1078	33.38	131.29	83.4	84.5	13.4	19	15.3	76.7
466	32.74	131.1	34.3	26.3	16.1	43.3	36.2	198.3
474	33.01	131.29	56.2	60.9	16.3	26.7	22.2	123.3
1070	33	130.87	27.2	40.3	16.4	68.6	67.4	318.5
465	32.84	130.76	11.5	20.6	16.6	88.2	79.3	413.3
93	32.55	130.65	30.7	0	16.8	14.4	10.3	67.9
1137	33.08	131.38	67.7	72.2	20.3	29.5	22.3	158.9
1073	32.4	130.83	45.6	0	23.6	15.5	15	93.4
710	33.19	130.92	48	61.1	23.7	34.9	33.4	211
471	33.5	131.17	88	84.5	27	11	8.3	73.3
89	33.33	130.97	64.1	77.1	27.3	17.2	15.6	115.3
700	33.01	130.75	26.5	36.1	27.3	29.3	26.6	196.5
709	33.23	131.58	91.6	84.5	29.8	29	21.4	207.5
705	33.54	131.36	100.6	84.5	31.4	12.8	9.2	95
706	33.35	131.59	100	84.5	31.7	23.5	19.9	176.3
1075	32.34	130.66	51.6	0	32.7	9.7	8.9	74.7
1081	32.9	131.44	66.1	57.6	34.9	16	15.8	128.6
773	32.58	130.43	39.5	0	35.7	11.4	8.8	93.3
478	32.46	131.15	53.4	1.3	35.9	17.9	16.4	147.1
1077	33.51	131.52	108	84.5	36.6	12.5	10.2	104.1
477	32.68	131.33	55.8	31.6	37.7	23.9	17.5	204
1076	32.29	130.99	60.4	0	38.8	12.7	12.1	111
464	32.93	130.55	26.9	19.3	39.3	19.7	18	173.4
1069	33.06	130.62	33.9	34.9	40.3	16.1	13.3	144.5
469	32.24	130.8	62.4	0	41	9.8	9.5	88.8
1064	33.56	131	89.5	84.5	41.4	10.1	8.8	92.6
475	32.99	131.59	81.5	72.9	41.8	11.1	9.7	102
468	32.3	130.51	60.2	0	44.5	4.5	3.7	44
696	32.72	130.35	39.6	0	44.7	17.6	13.3	170.5
88	33.46	131.69	115.2	84.5	45.4	13.2	9.4	129.4
452	33.47	130.83	76	83.6	45.9	10.3	8.9	101.7
688	33.33	130.7	60.7	64.4	48.6	14	12.1	144.3
694	32.79	130.34	40.3	0	48.9	15.5	12.6	160.7
697	32.66	130.29	46.8	0	49	17	14.8	177.2
1079	33.1	131.75	99.3	84.5	49	10.7	9.4	111
1083	32.53	131.36	65	18.3	49.4	19.5	16.8	204.2
473	33.24	131.8	109.8	84.5	49.9	11.6	9.8	122.7
775	32.43	130.32	58	0	49.9	5.8	4.1	60.7
1082	32.85	131.63	82.7	61.9	52.7	9.6	7.7	105.1
453	33.21	130.56	50.4	46.4	52.9	13	10.7	143
470	33.67	131.56	123.9	84.5	53.1	12.7	10.4	140.9
686	33.7	131.02	104.2	84.5	53.1	7.9	6.7	87.6
479	32.25	131.19	73.5	0	53.4	10.9	9.2	121.8
712	32.38	131.33	71.4	3	55	13.1	11	149.2
831	33.1	130.47	44.6	31.3	55	10.2	8.5	116.2
695	32.71	130.22	52	0	56.8	10.8	9	125.4
687	33.64	130.82	95.2	84.5	58.2	7.8	7.1	92.5
461	32.87	130.27	47	0.5	58.3	12.9	11	153.6
711	32.56	131.53	77.9	28.9	61.3	19.5	17.2	241
463	32.64	130.15	59.5	0	61.5	8.8	7.1	109
714	32.05	130.87	83.9	0	62.5	8	7.3	100.1
693	32.8	130.17	55.8	0	63.8	10.6	8.3	134.4
485	32.06	130.6	83.5	0	64.3	5.7	4.8	73.5
1063	33.58	130.68	88.6	84.5	64.7	9.4	8.8	120.4
1074	32.37	130.18	72.2	0	64.8	4.9	4.1	63.2
774	32.52	130.09	70	0	68.5	5.4	4.5	72.1
90	32.92	131.88	106.4	80.5	68.6	6.6	5.7	88.3
771	33.35	130.44	68.9	54.5	70.4	8	6.2	110.1
476	32.7	131.76	94.8	53.7	71.3	11.3	9.7	156.3
685	33.75	130.75	106.6	84.5	71.4	6.9	5.8	95.3
1061	33.87	130.97	121.7	84.5	72.1	6.4	4.9	89.6
451	33.5	130.52	82.4	72.9	72.6	8.3	6.8	116.2
828	33.37	132.05	136.8	84.5	73.7	9.7	7.6	138.6
717	32.2	130.18	85.8	0	74.7	3.8	2.8	54.8
1085	32.11	131.35	94.4	0	74.7	8.3	6.7	118.8
94	32.45	131.63	91.3	23	75.8	13.4	12	194.6
481	31.97	131.08	97.3	0	75.8	6.3	4.7	91.1
1084	32.32	131.58	94.5	8.3	79	11.6	9.2	174.7
413	33.98	131.29	141.3	84.5	79.2	6.4	5.2	95.6
1086	32	131.25	100	0	79.3	7	5.1	105.1
454	33.27	130.27	71	39.5	80.6	8.7	6.2	132.7
1080	32.94	132.04	121.5	84.5	81.1	5.5	4.7	84.8
1068	32.77	129.96	75	0	81.6	6.7	4.9	103.3
480	32.17	131.52	99.8	0	82.2	10	7.3	155.1
1087	31.88	130.98	104.2	0	82.6	5.9	5.9	90.9
486	31.86	130.76	104.5	0	83.8	6	4.4	94.3
1039	34.02	131.11	141.1	84.5	85	7.4	5.7	117
455	33.1	130.09	71.1	14.4	85.1	9.5	6.9	150.5
772	32.95	129.99	74.1	0	85.4	9.3	7	148.4
79	34	130.91	135.2	84.5	87.4	5.9	4.2	95
96	32.01	130.19	101.9	0	88.1	4.1	3.1	67
1060	33.93	130.72	127	84.5	89.1	6.7	4.8	110.5
837	31.82	130.6	108.9	0	89.3	4	4	65.3
95	32.02	131.47	109.2	0	89.9	11	8.4	181.6
412	34.06	131.53	158.5	84.5	91.4	6.3	5.1	105
1066	33.29	130.1	83.4	33.2	95.4	6.5	4.8	112.4
1089	31.74	130.74	116.9	0	96.3	4.9	4.8	86.3
450	33.54	130.25	95.7	63.9	96.4	4.6	3.5	79.7
715	31.84	131.31	118	0	97.1	6.1	4.4	106.3
86	33.47	132.28	161.3	84.5	97.3	7.5	6.9	131.6
482	31.74	131.02	119.9	0	98.5	5.8	4.2	103.6

## Sheet: Wenchuan seismic
Station name	Station Latitude	Station Longitude	Distance to hypocenter	Distance along FinDer line source	Closest distance to FinDer line-source	PGD1	PGD2	D
			[km]	[km]	[km]	[cm]	[cm]	[cm]
51.MXT	31.7	103.9	91.2	74.4	4.3	23.8	17.3	50.7
51.MXN	31.6	103.7	73.3	52.6	8.2	19.8	15.6	58.2
51.LXT	31.6	103.5	68.7	38.4	20.5	18.4	16.2	100
51.MZQ	31.5	104.1	86.6	74.4	24.9	121.1	109.5	758.3
51.JYH	31.8	104.6	143.6	132	29.9	52.2	40.9	375
51.LXM	31.6	103.3	69.2	23.8	32.8	17.8	16.8	136.9
51.SFB	31.3	104	66.7	52.6	35.7	56.5	45.6	462.9
51.JYD	31.8	104.7	151.1	139.3	36	46.1	40	380.3
51.AXT	31.5	104.3	101.6	89	37.1	42.3	30.4	357.2
51.MXD	32	103.7	114.8	81.7	42	14.9	12.8	138.2
51.PWM	32.6	104.5	205	182	44.2	17.7	14.8	170.4
51.JYC	31.9	105	180.6	168.1	45.6	32.6	27	321.4
51.LXS	31.5	102.9	76	0	50.6	17.6	13	187.3
51.DYB	31.3	104.5	109.4	89	66.4	41.3	36.3	541.6
51.GYS	32.2	105.8	262	247.4	68	26.6	21.8	356
51.HSL	32.1	103.3	123.2	60.2	75	9.2	7.1	132.4
62.WIX	33	104.5	244.3	210.8	78.2	15.2	12.3	226.5
