# Supplementary figures and images for: FinDerS(+): Real-Time Earthquake Slip Profiles and Magnitudes Estimated from Backprojected Displacement with Consideration of Fault Source Maturity Gradient
Source: Frontiers journal article supplement (doi:10.3389/feart.2021.685879), 2021-08-04

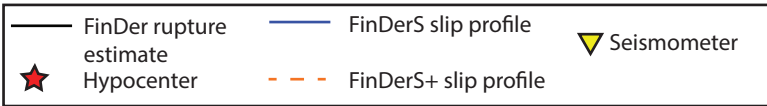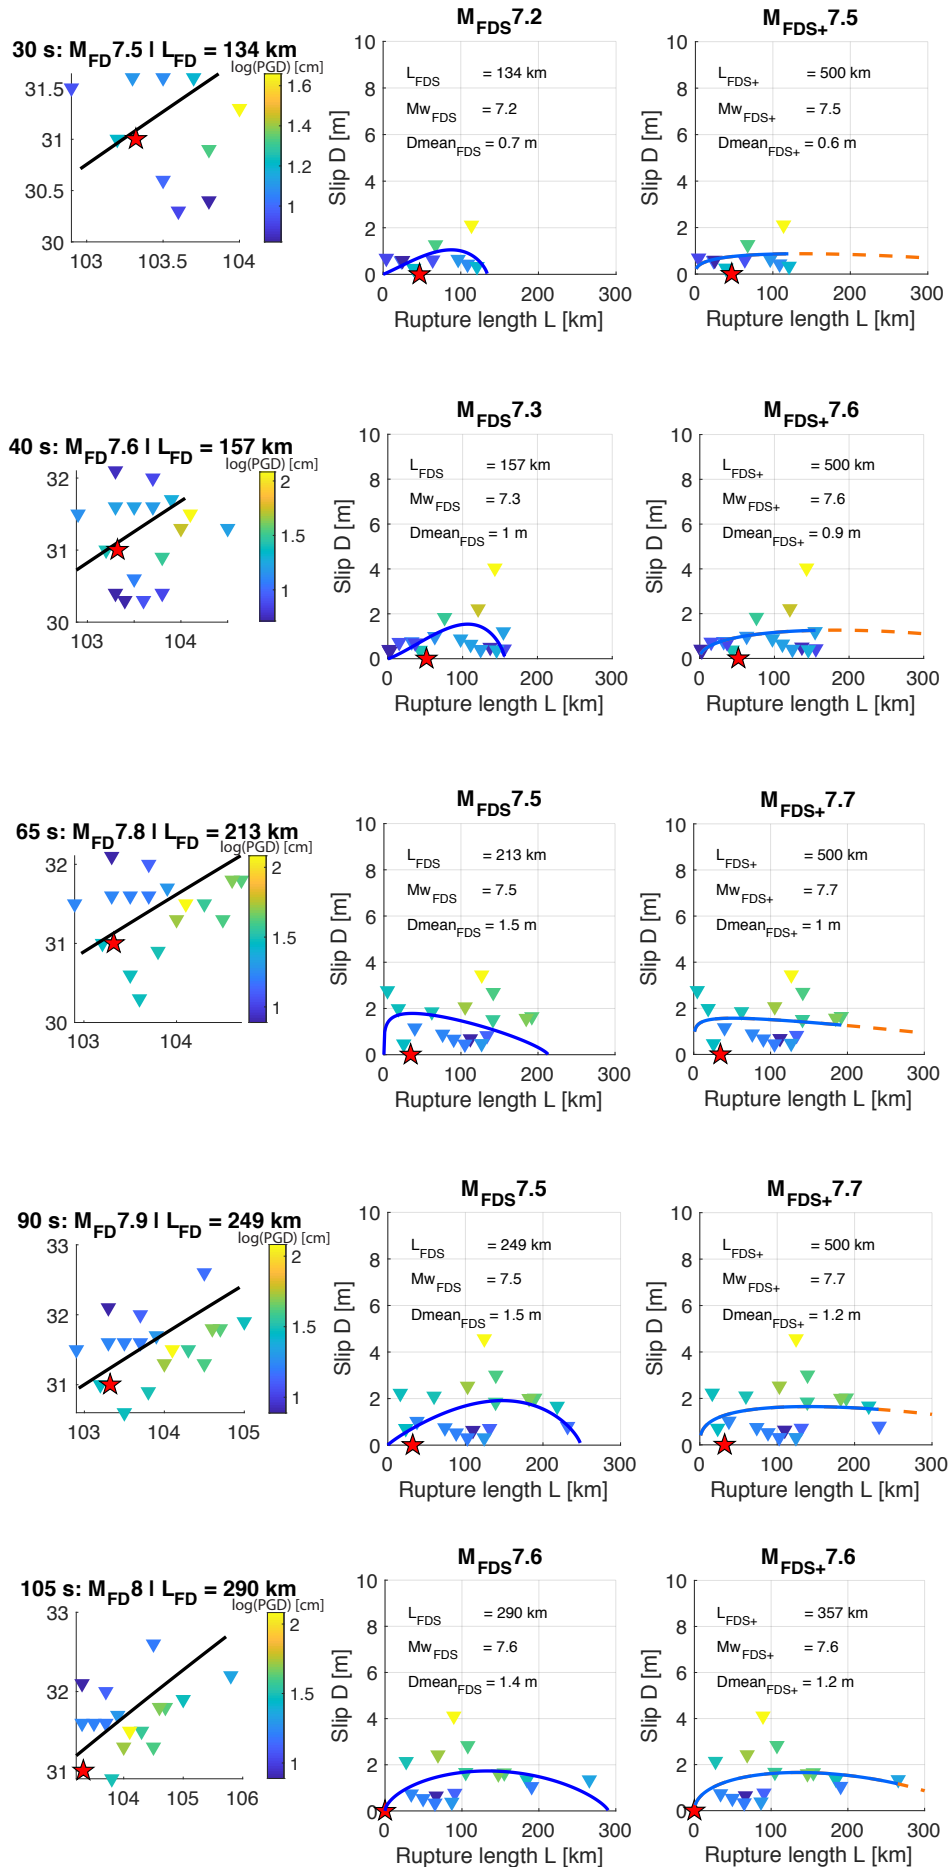

Supplement: Presentation_1.zip [file Presentation_1.zip]

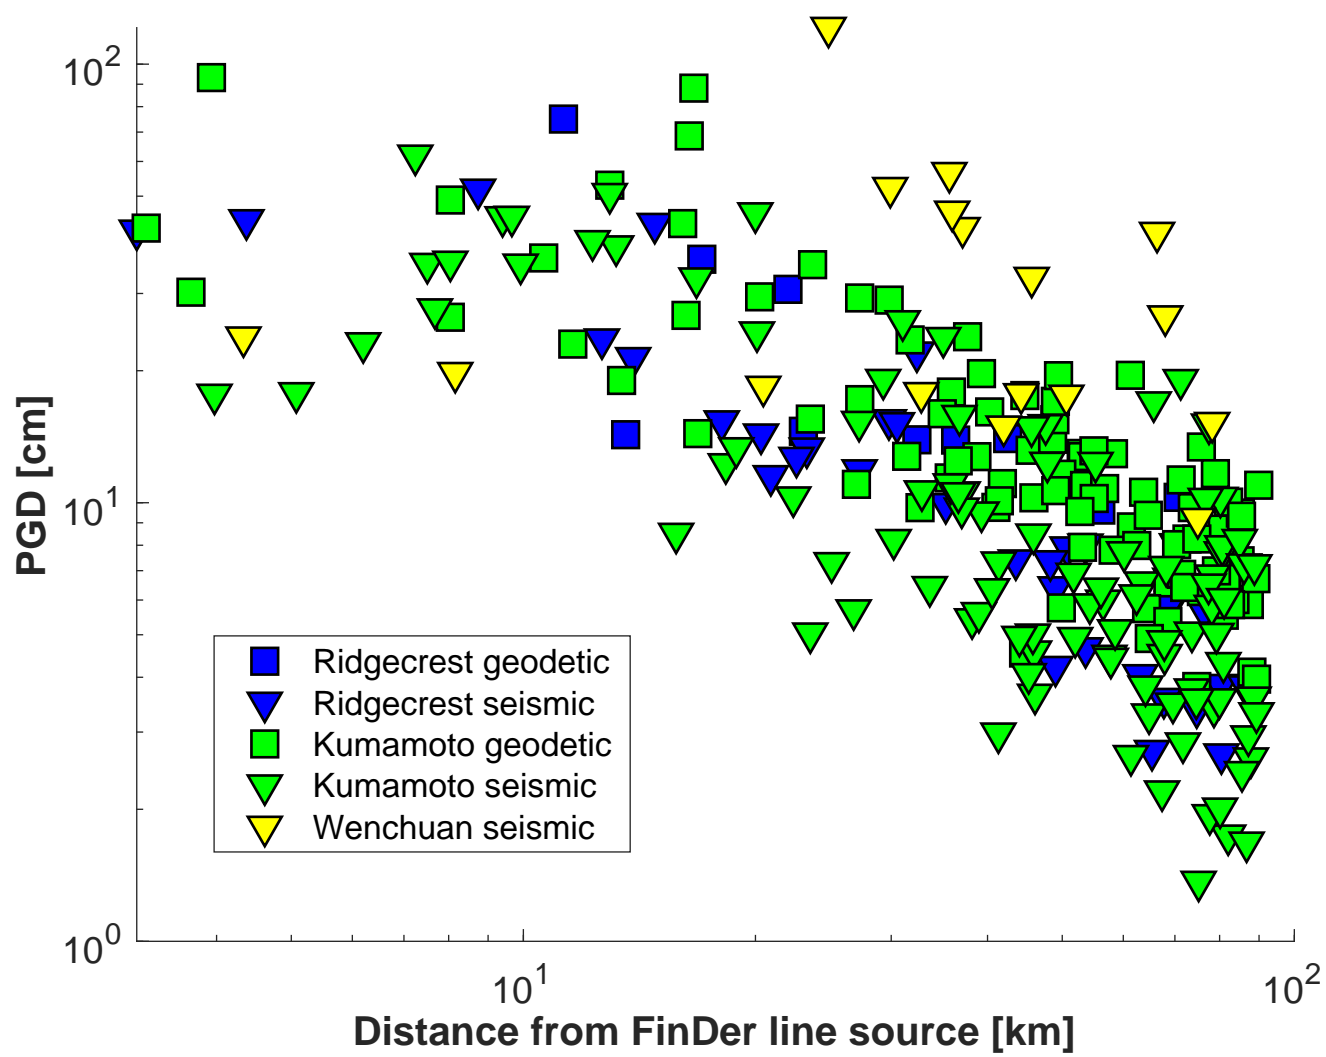

Supplement: Presentation_1.zip [file Presentation_1.zip]

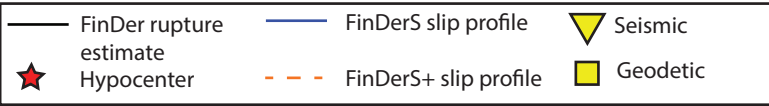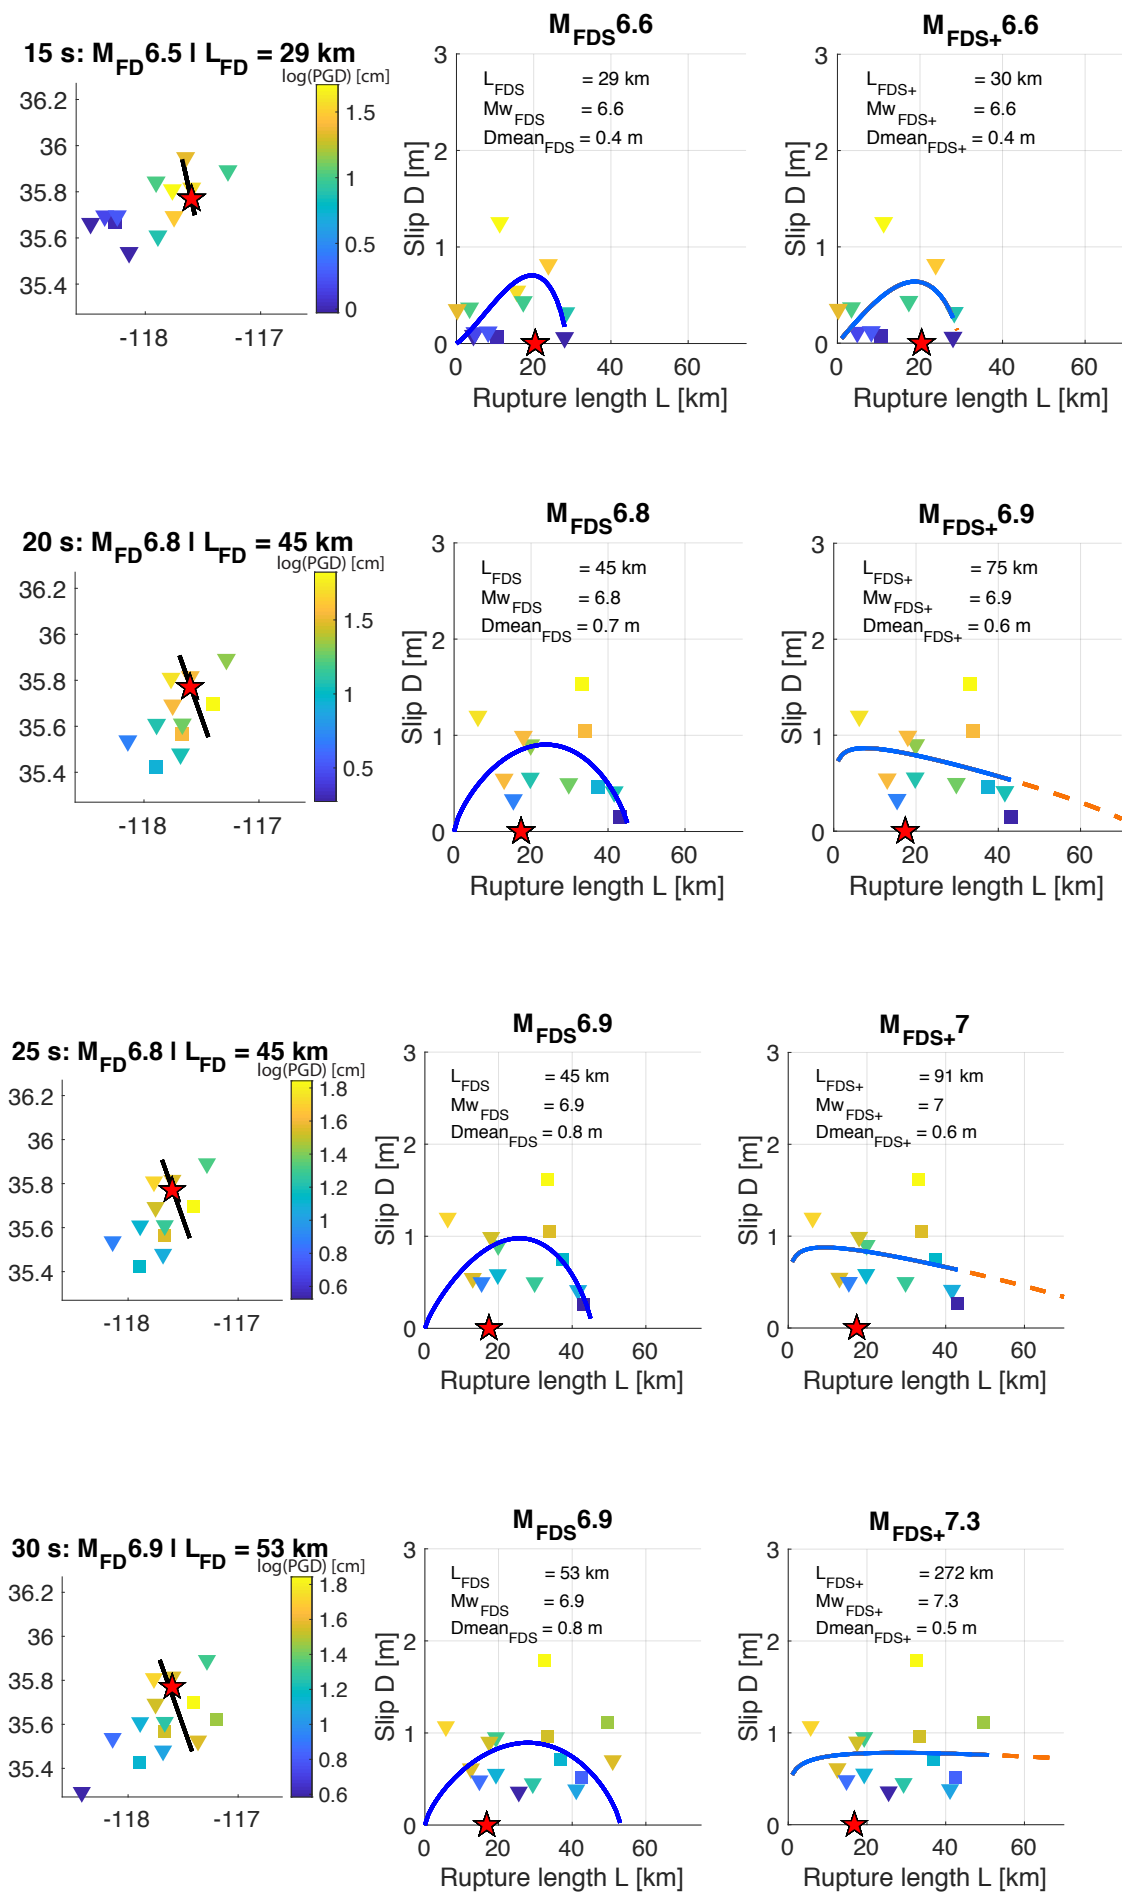

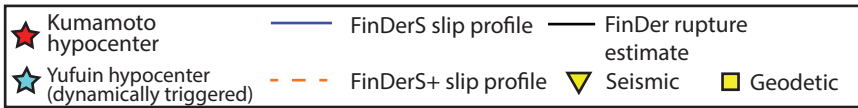

10 s:  $M_{FD} 6.7$  |  $L_{FD} = 39$  km

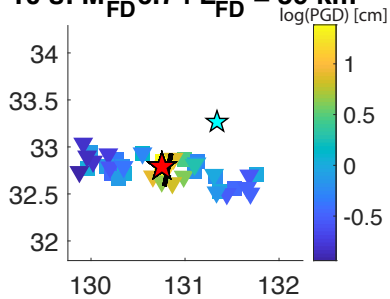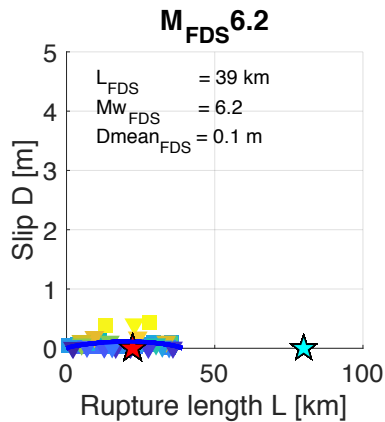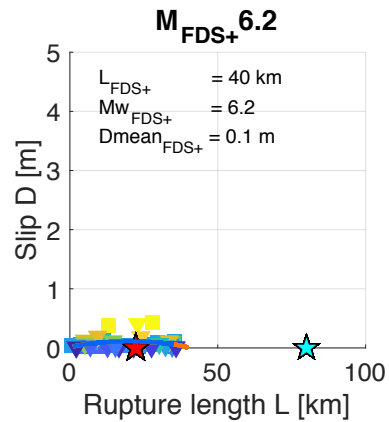

15 s:  $M_{FD} 7$  |  $L_{FD} = 62$  km

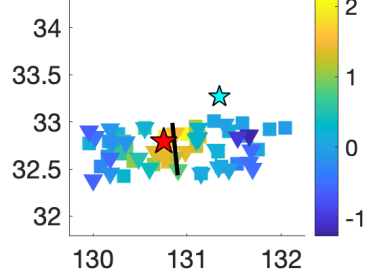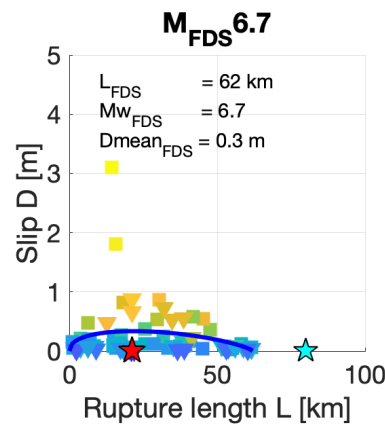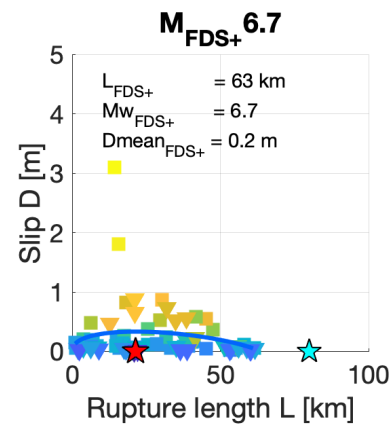

20 s:  $M_{FD} 7.1$  |  $L_{FD} = 72$  km

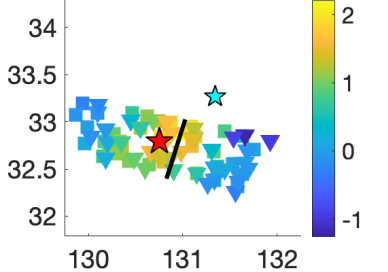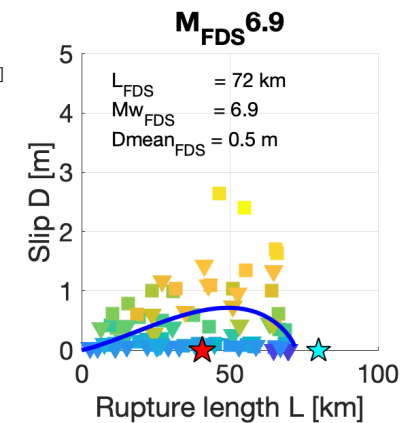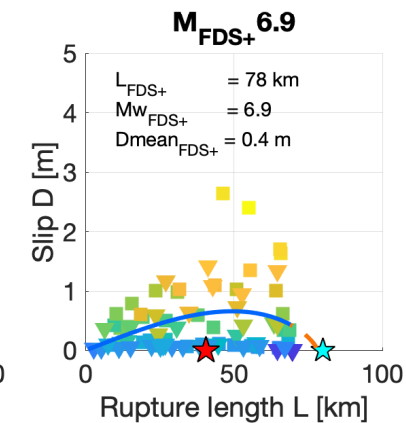

25 s:  $M_{FD} 7.2$  |  $L_{FD} = 84$  km

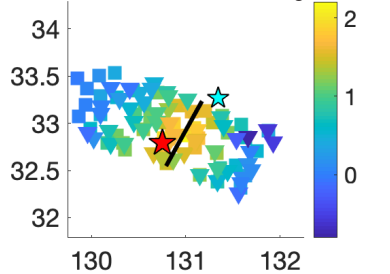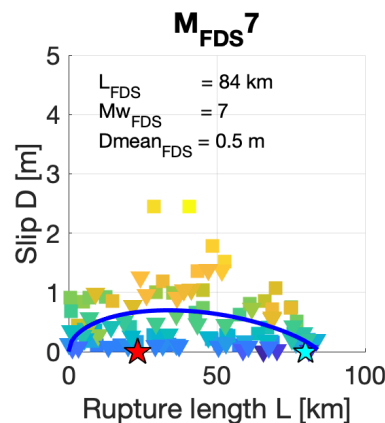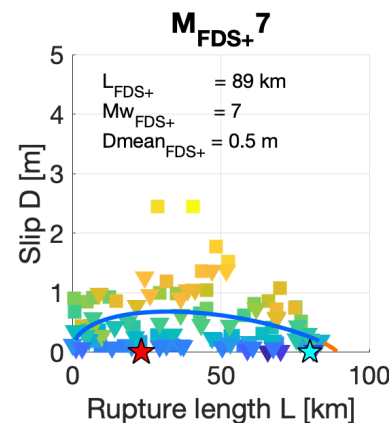



Supplement: Presentation_1.zip [file Presentation_1.zip]

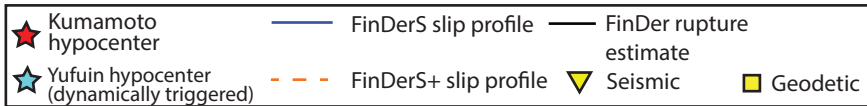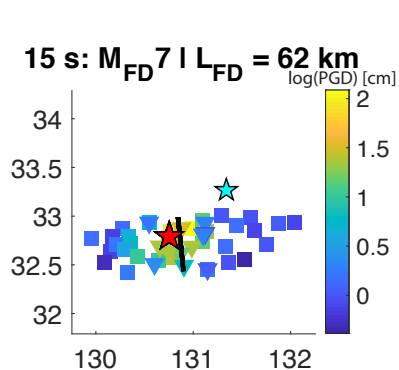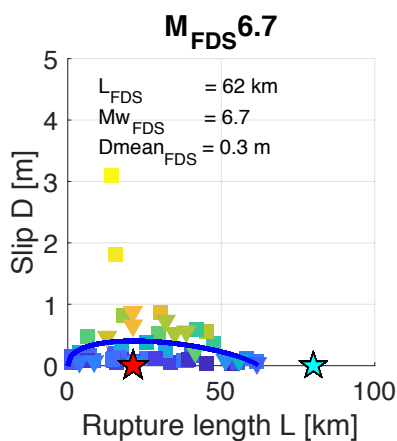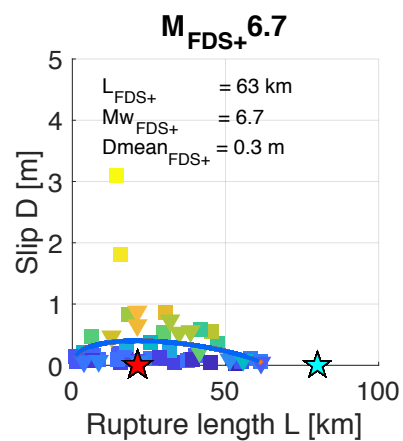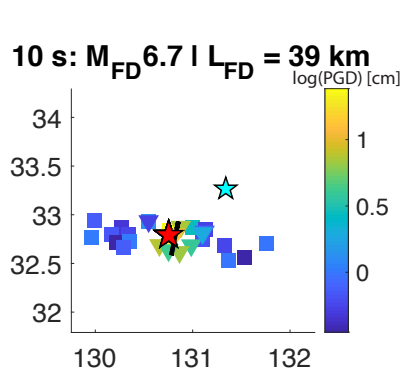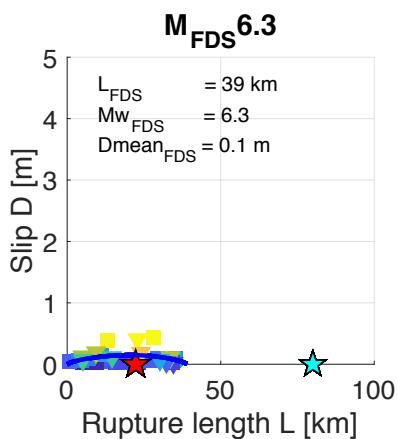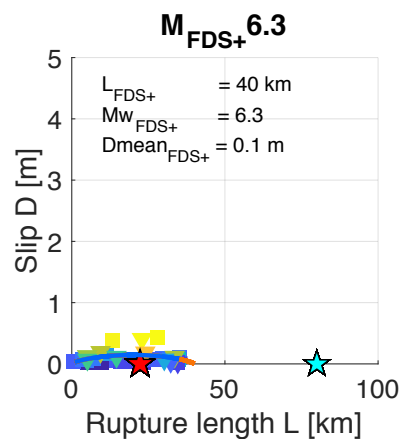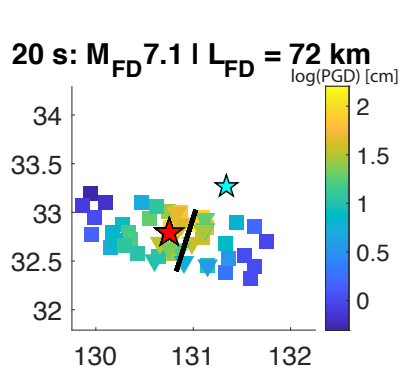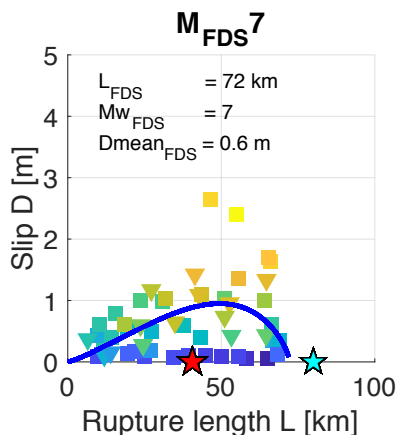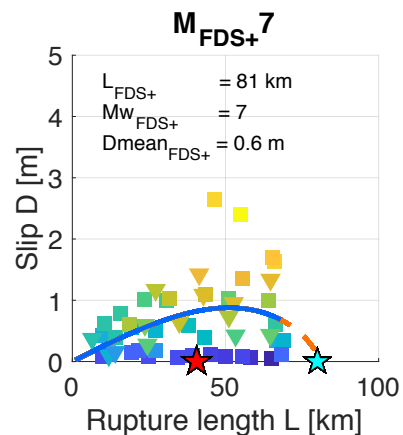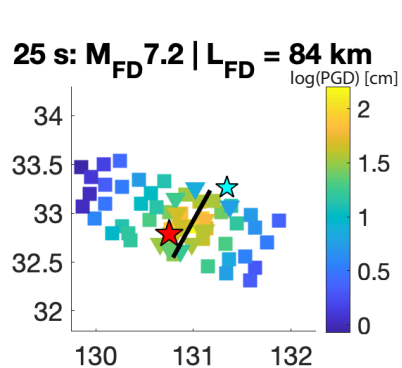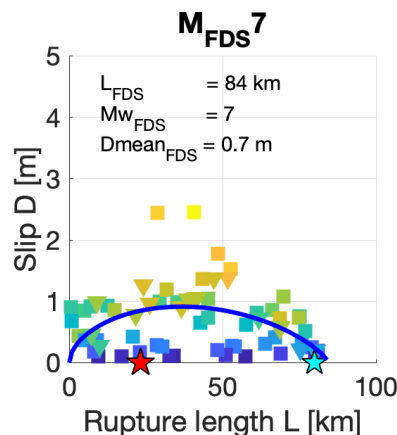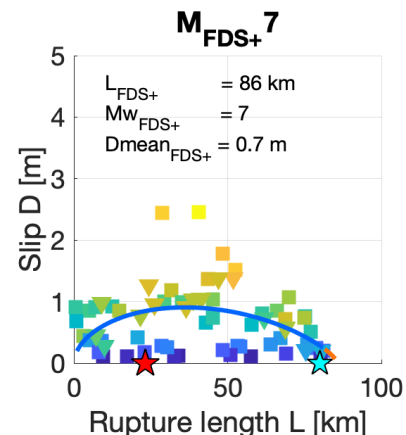

Supplement: Presentation_1.zip [file Presentation_1.zip]

GNSS Ridgcrest Displacements

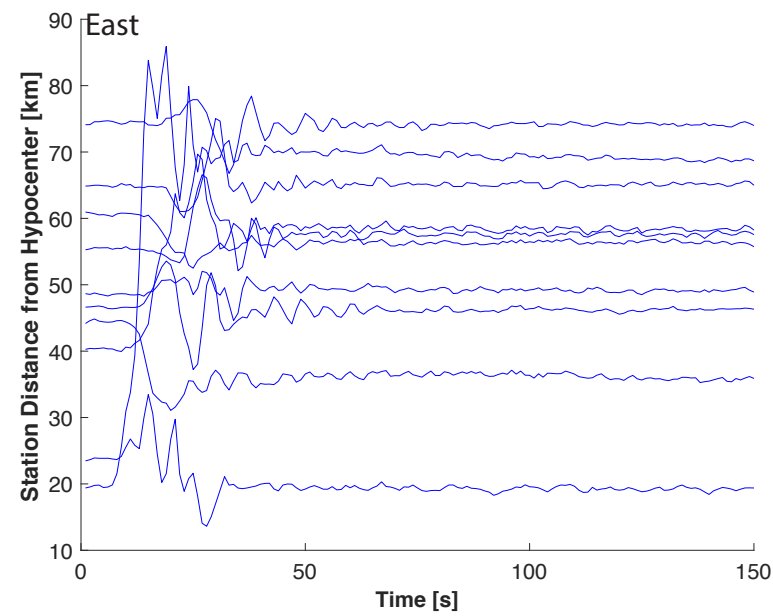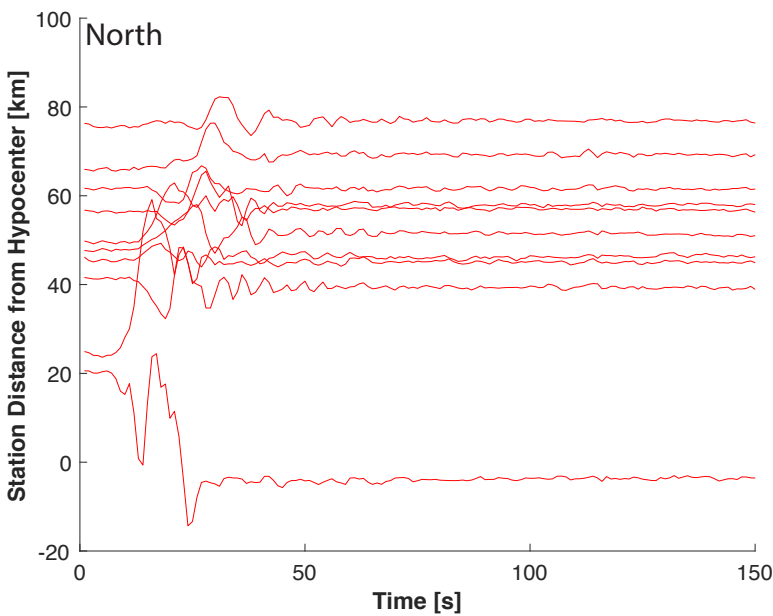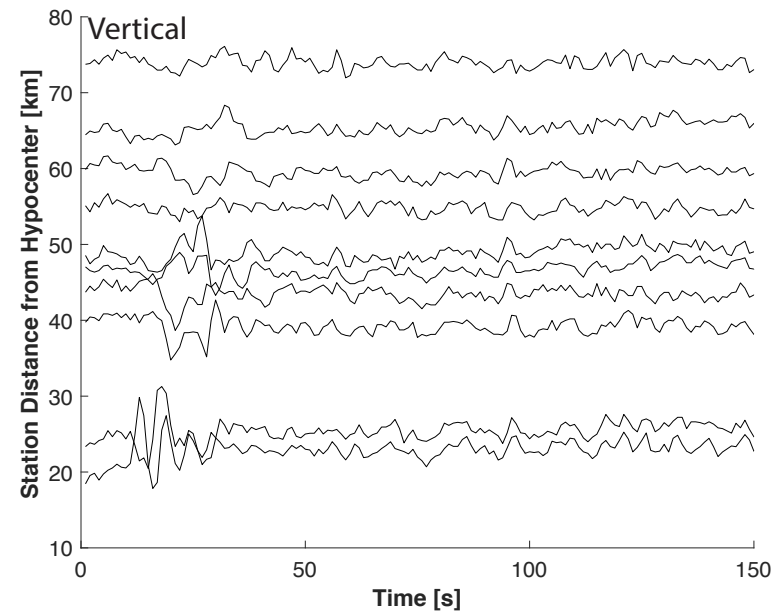

Supplement: Presentation_1.zip [file Presentation_1.zip]

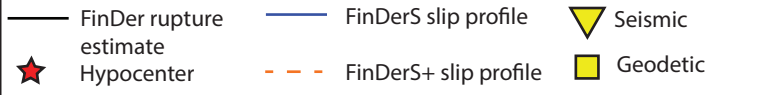

15 s:  $M_{FD} 6.5$  |  $L_{FD} = 29$  km

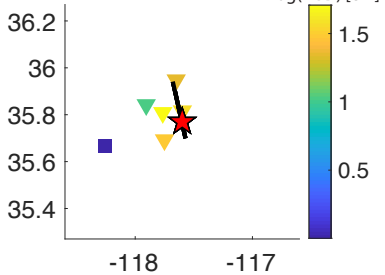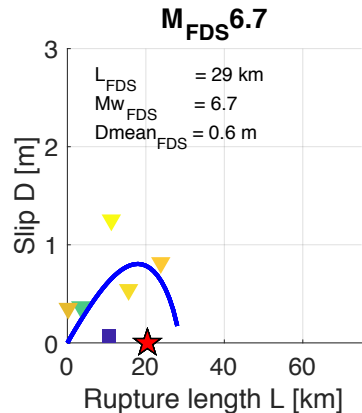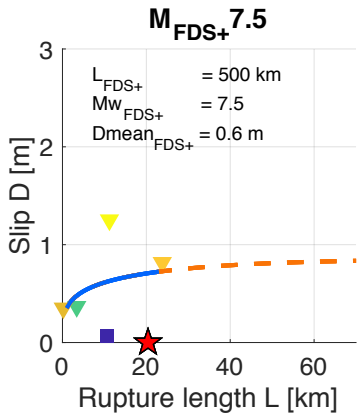

20 s:  $M_{FD} 6.8$  |  $L_{FD} = 45$  km

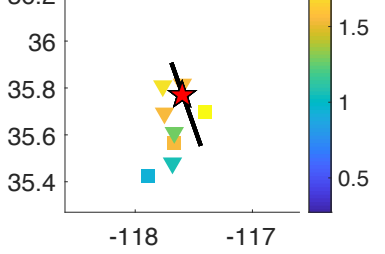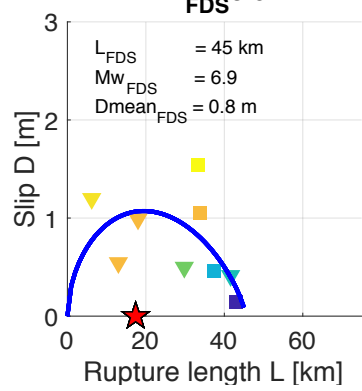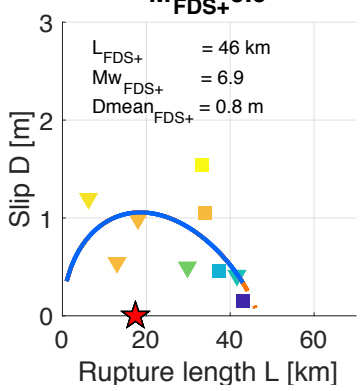

25 s:  $M_{FD} 6.8$  |  $L_{FD} = 45$  km

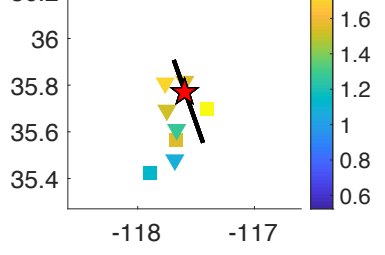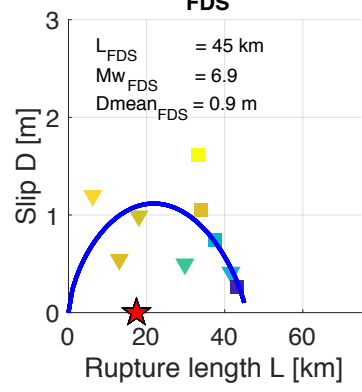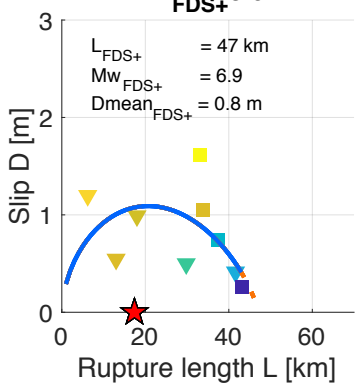

30 s:  $M_{FD} 6.9$  |  $L_{FD} = 53$  km

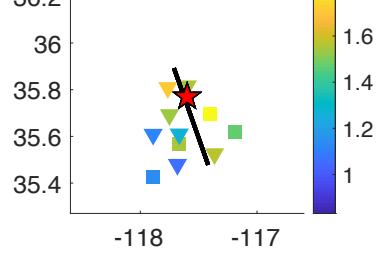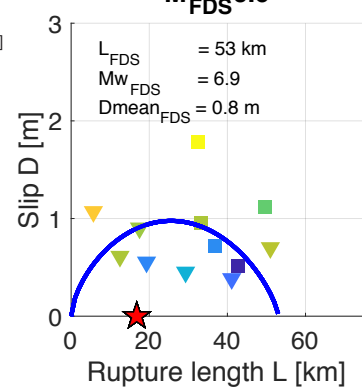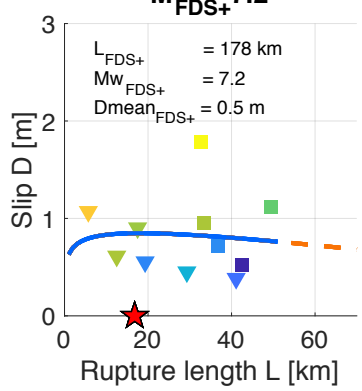

Supplement: Presentation_1.zip [file Presentation_1.zip]

Seismic Wenchuan Displacements

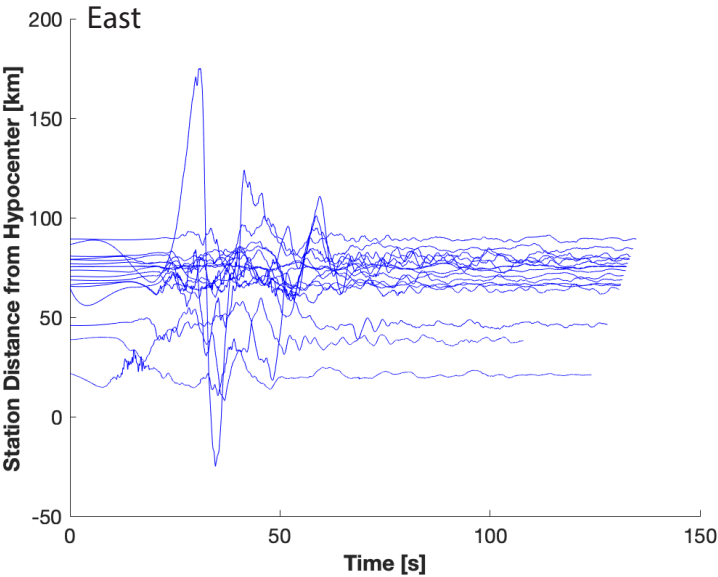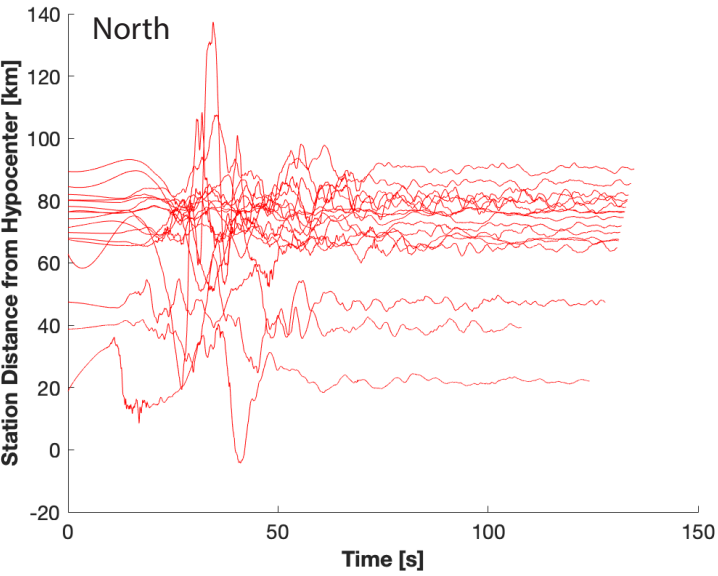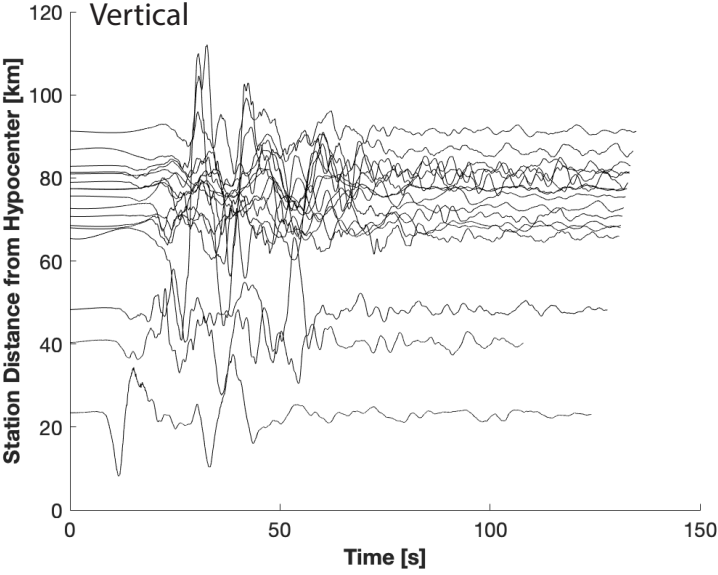

Supplement: Presentation_1.zip [file Presentation_1.zip]

## Seismic Kumamoto Displacements

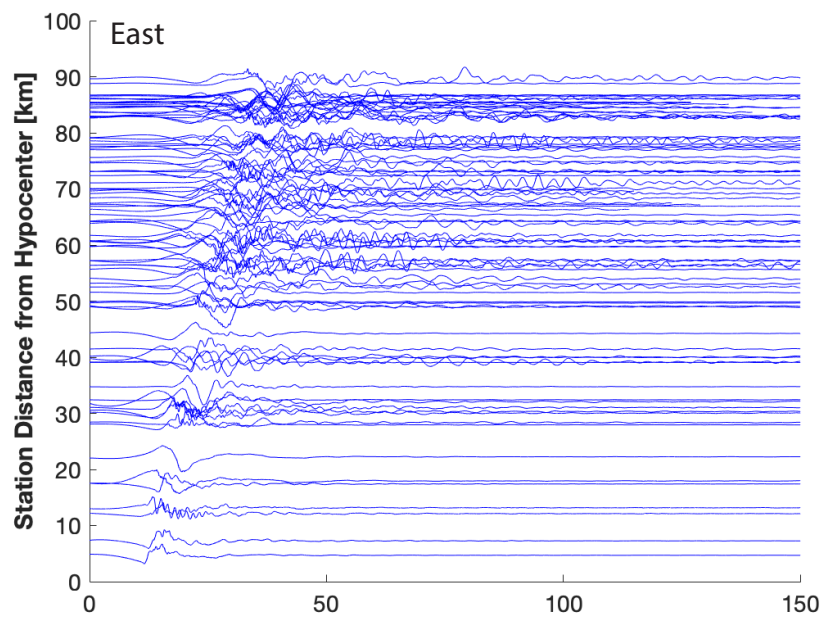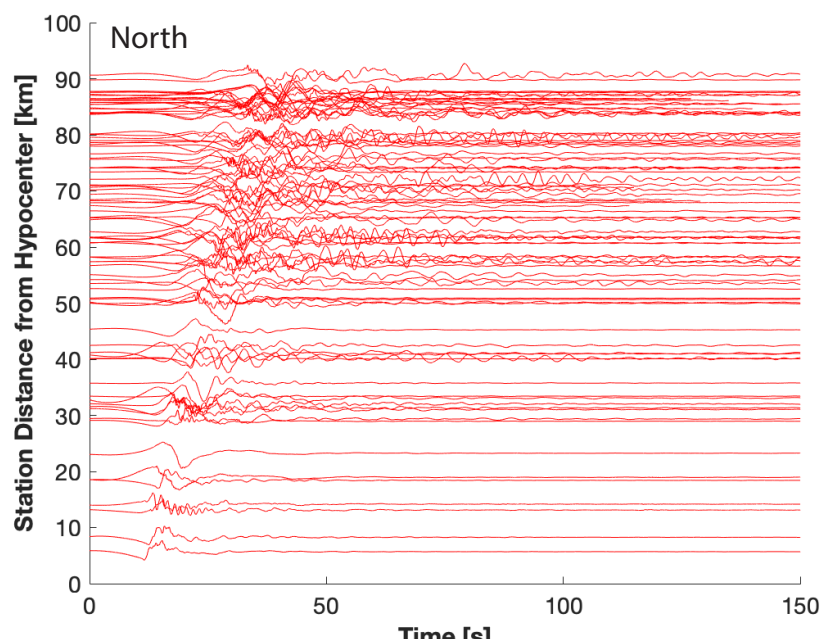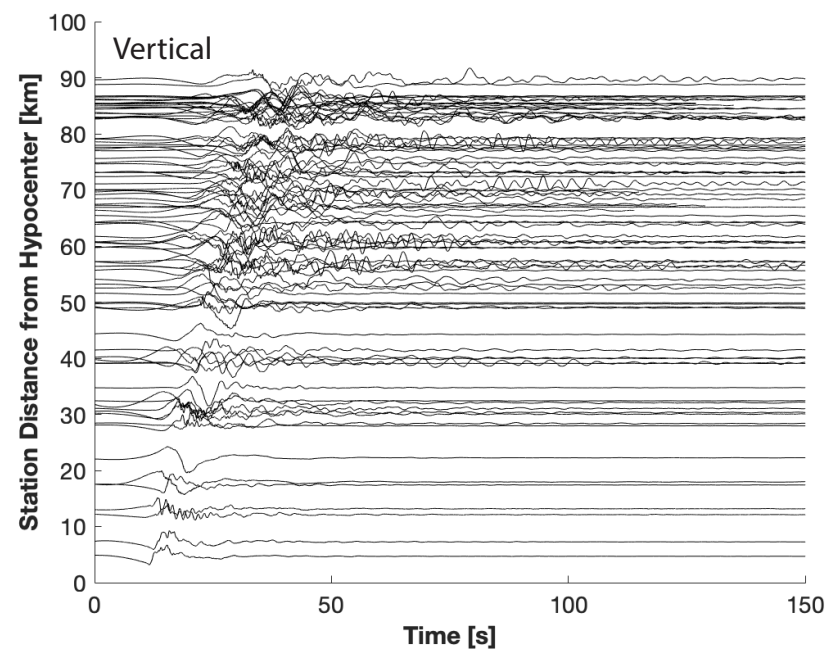

Supplement: Presentation_1.zip [file Presentation_1.zip]

Seismic Ridgecrest Displacements

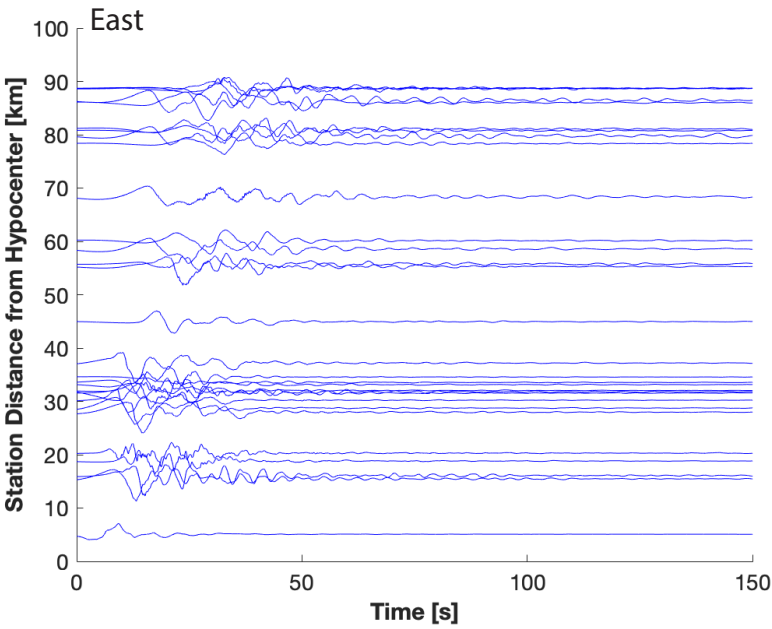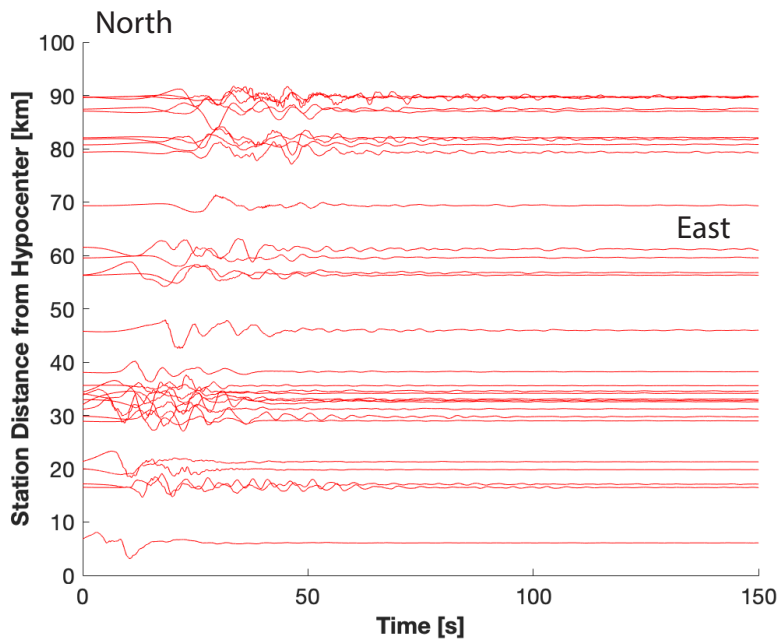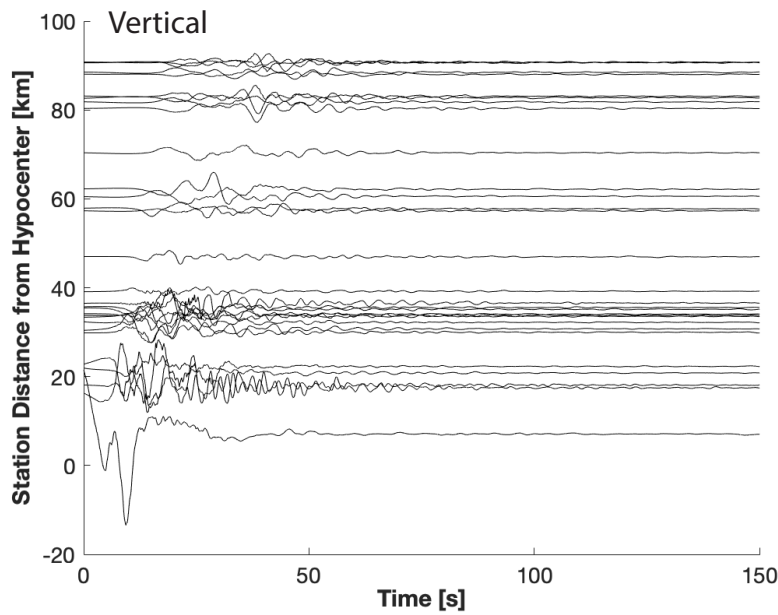

Supplement: Presentation_1.zip [file Presentation_1.zip]

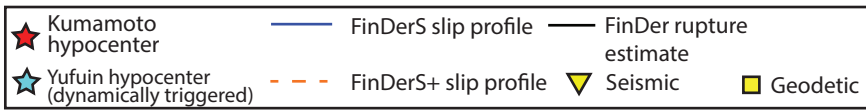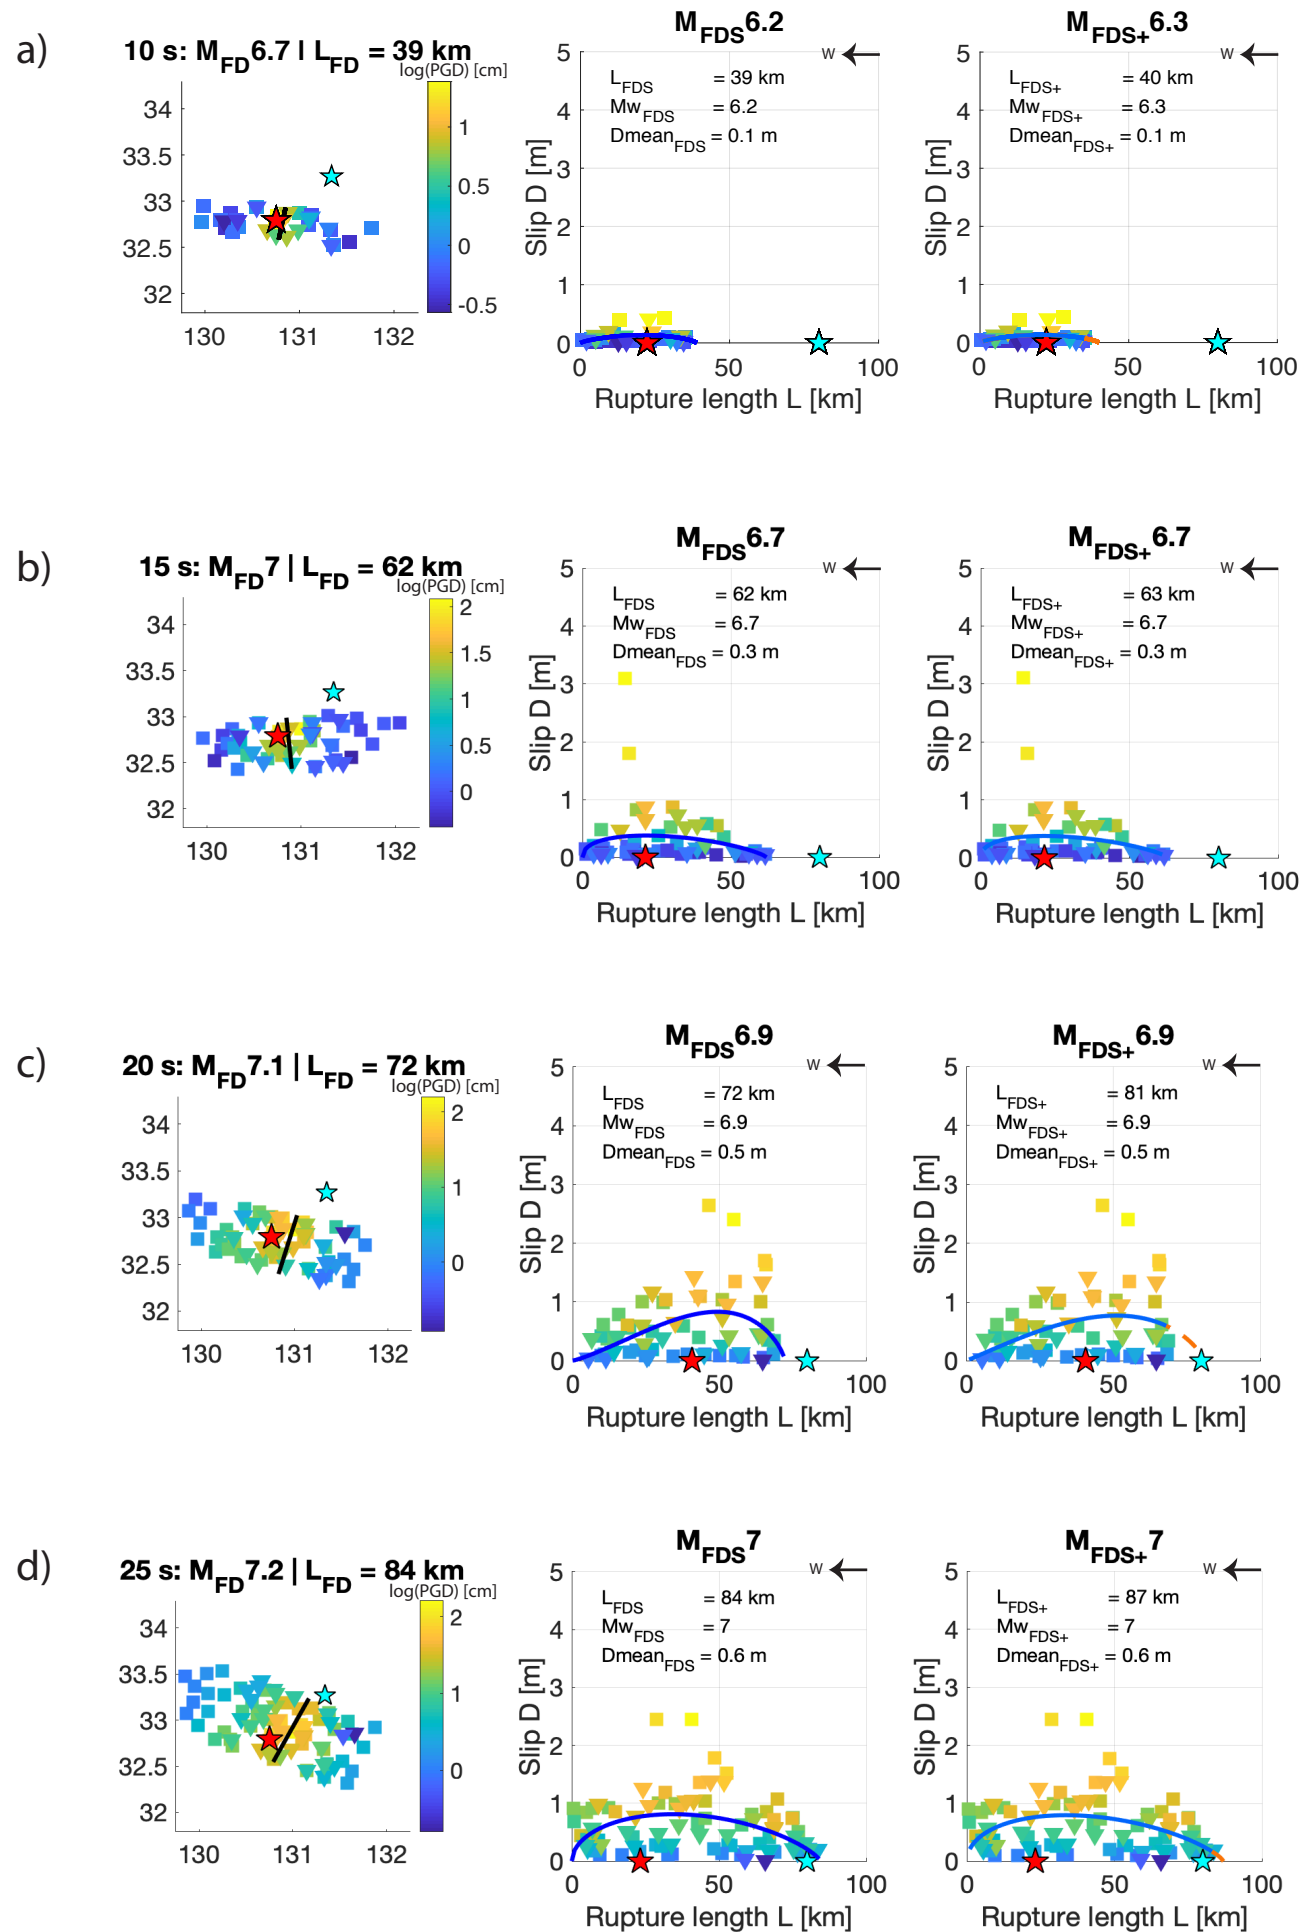

Supplement: Presentation_1.zip [file Presentation_1.zip]

-- update with new seismic & geodetic data

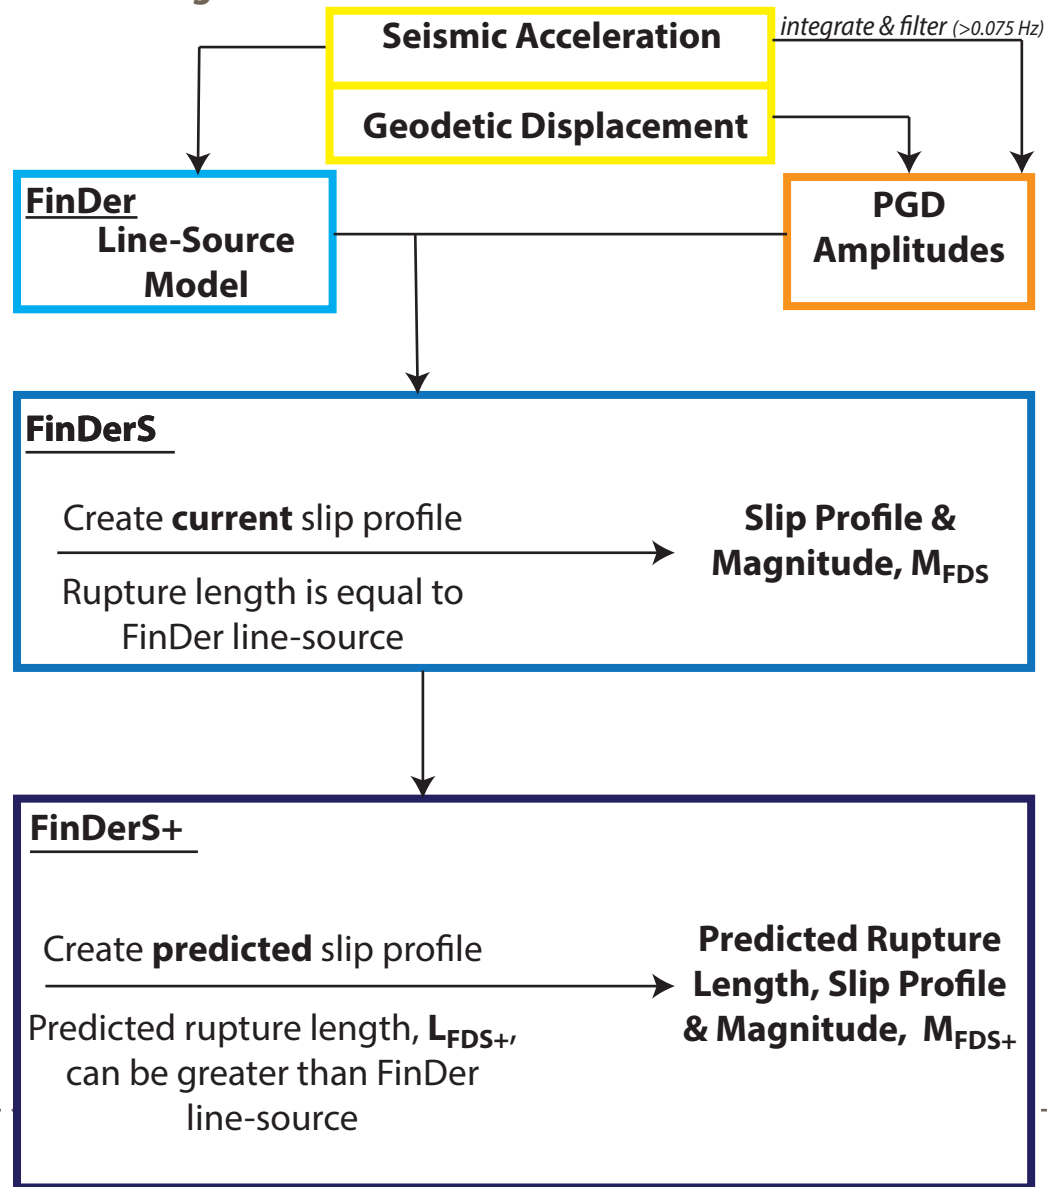

Supplement: Presentation_1.zip [file Presentation_1.zip]

GNSS Kumamoto Displacements

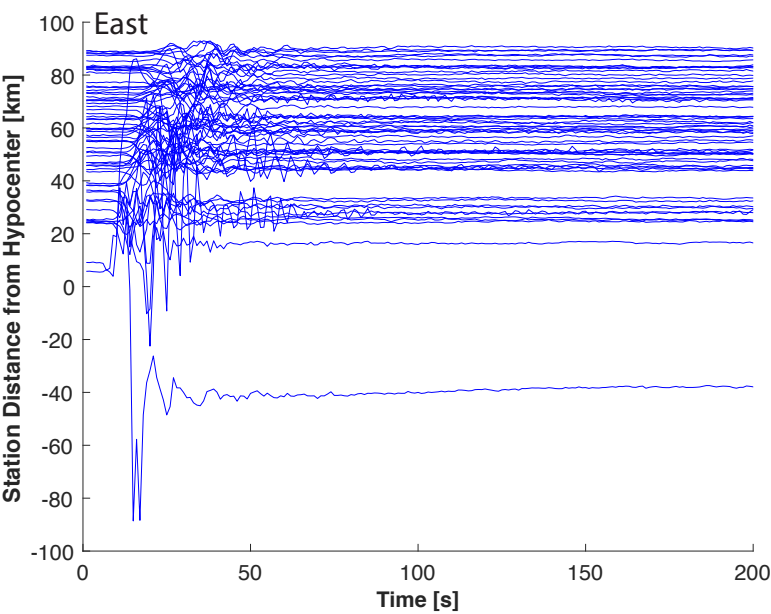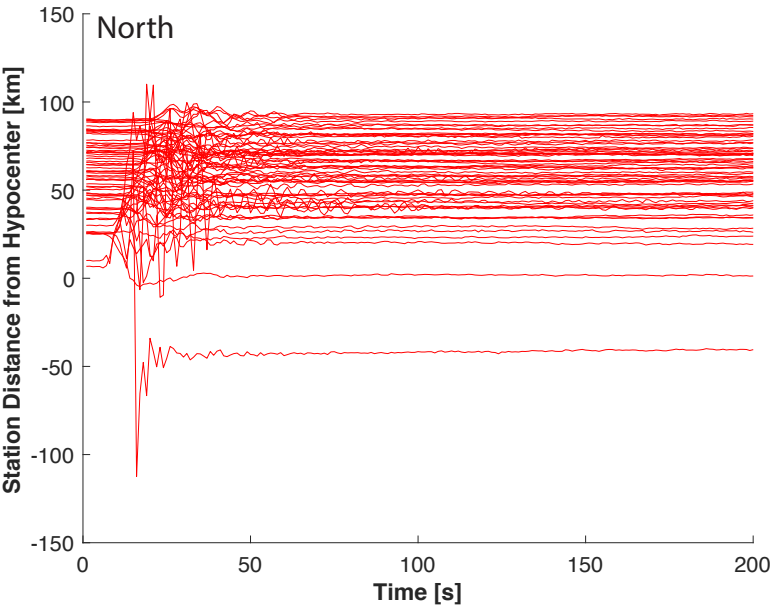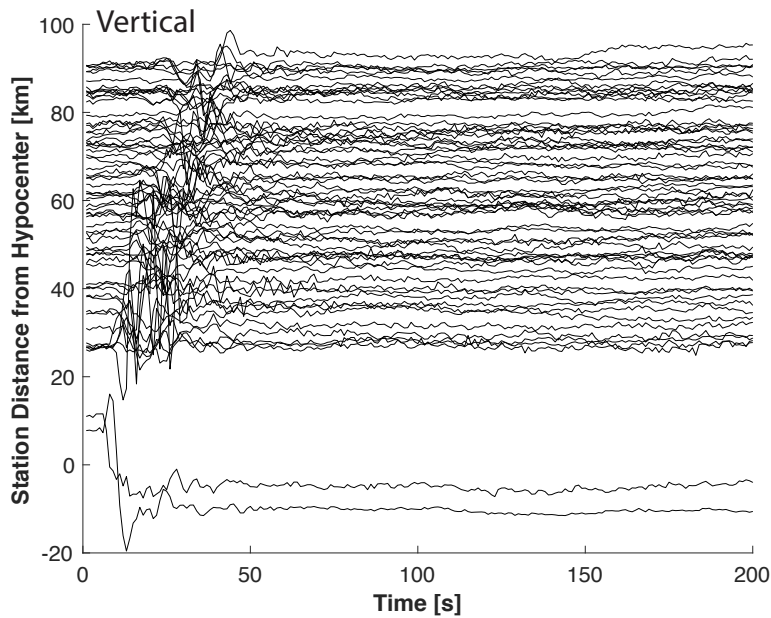

Supplement: Presentation_1.zip [file Presentation_1.zip]



Supplement: Presentation_1.zip [file Presentation_1.zip]

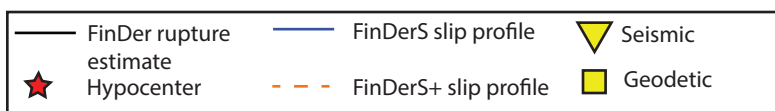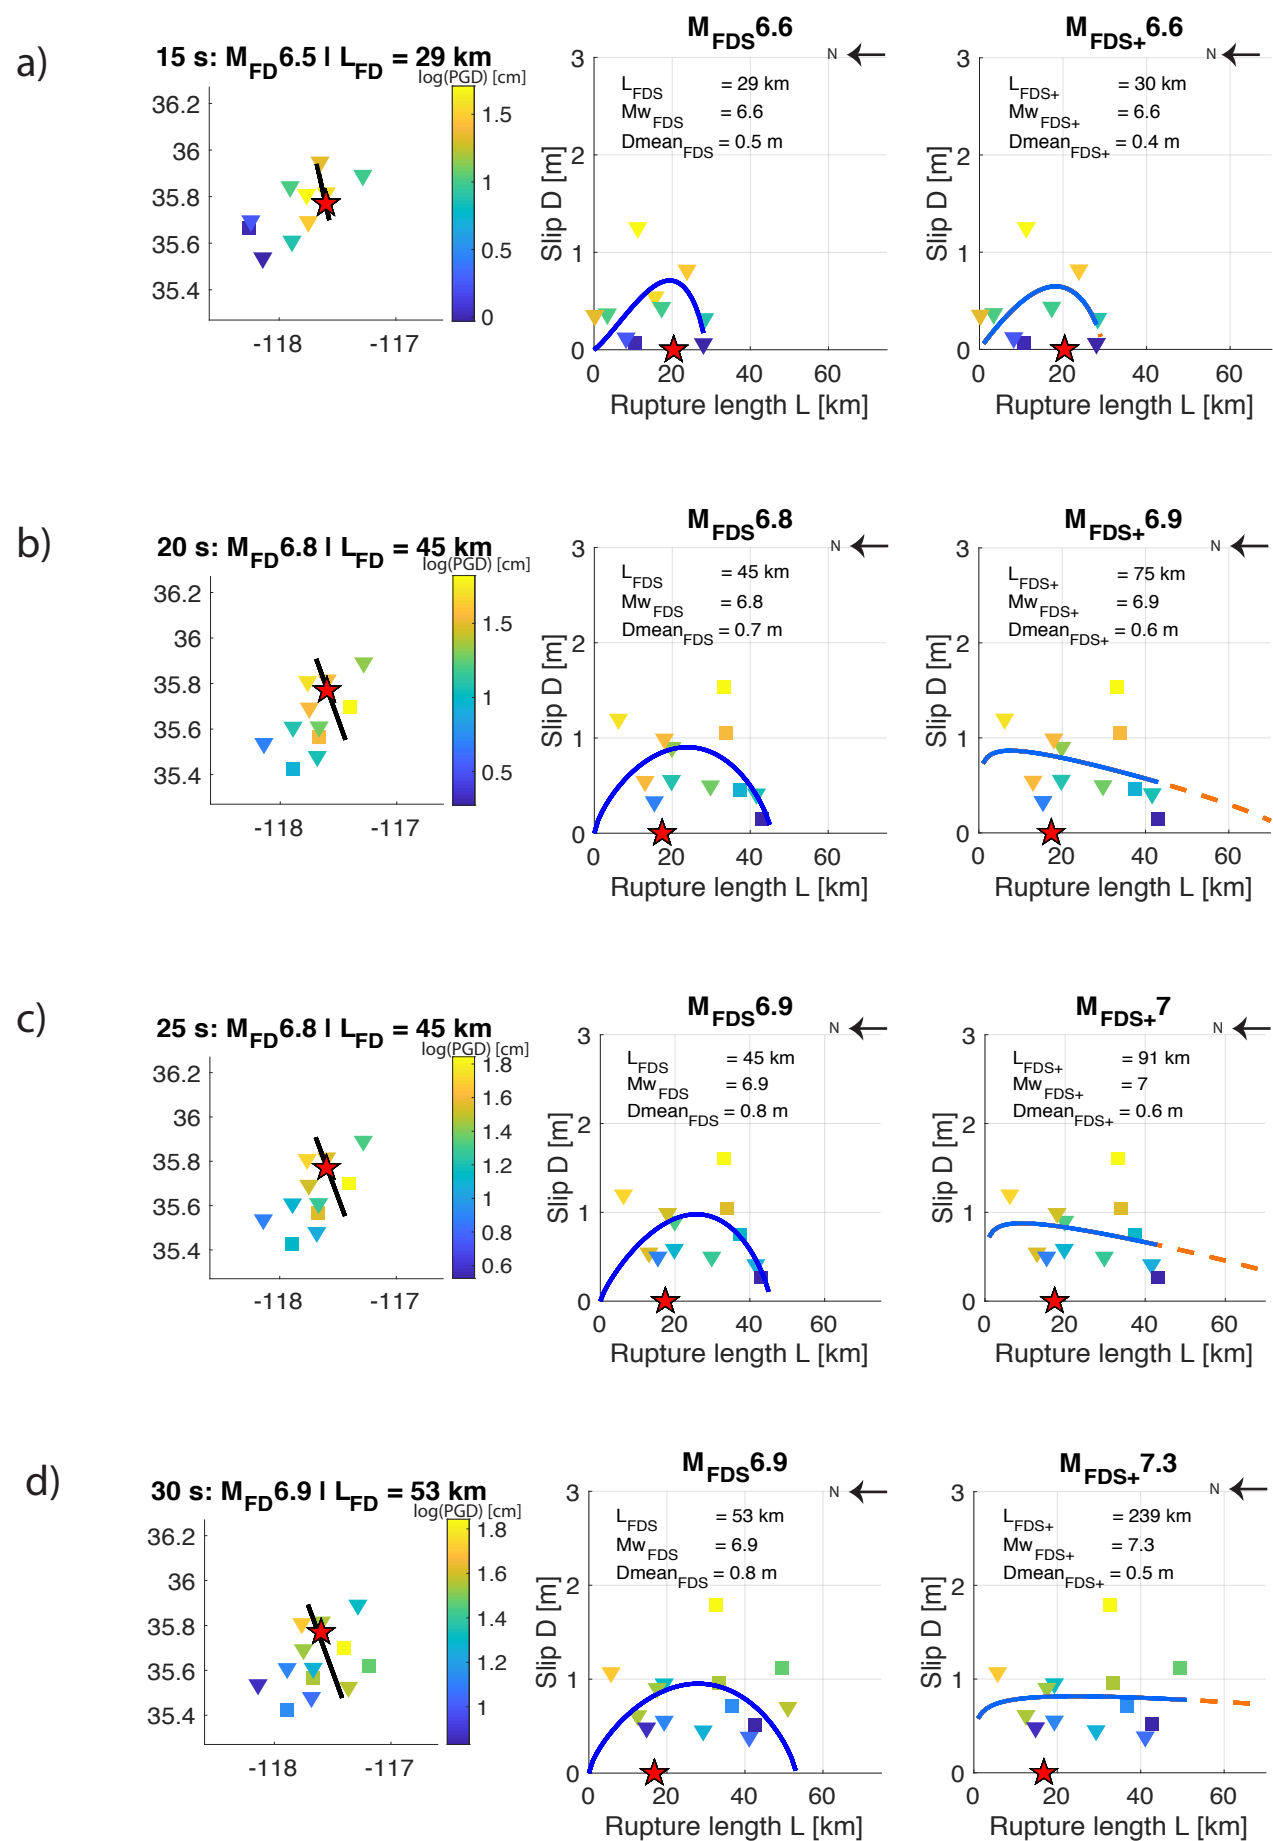

Supplement: Presentation_1.zip [file Presentation_1.zip]

a) 2019 Ridgecrest,  $M_w$  7.1

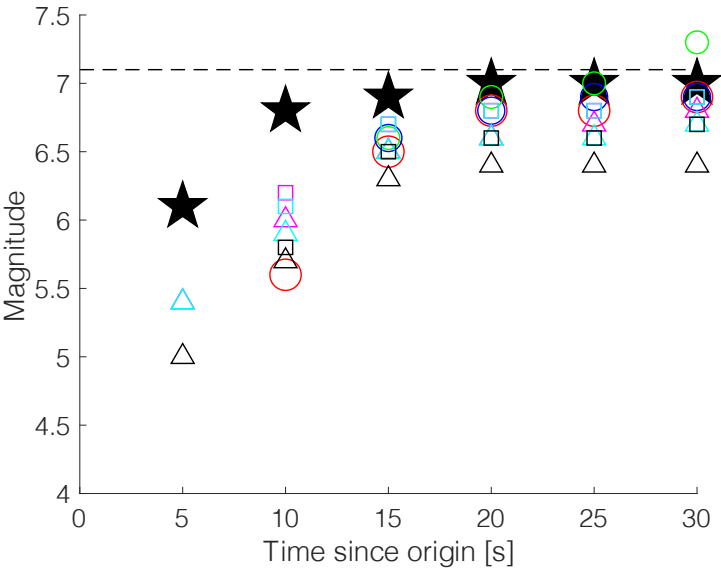

b) 2016 Kumamoto,  $M_w$  7.0

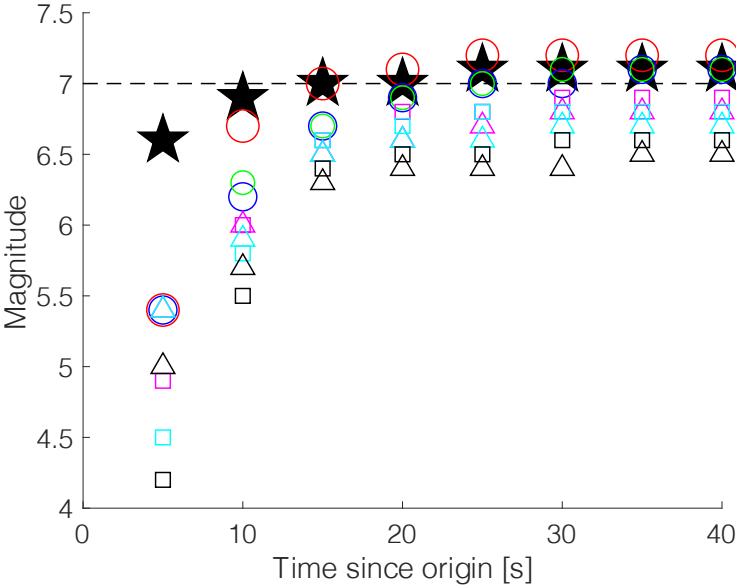

c) 2008 Wenchuan,  $M_w$  7.9

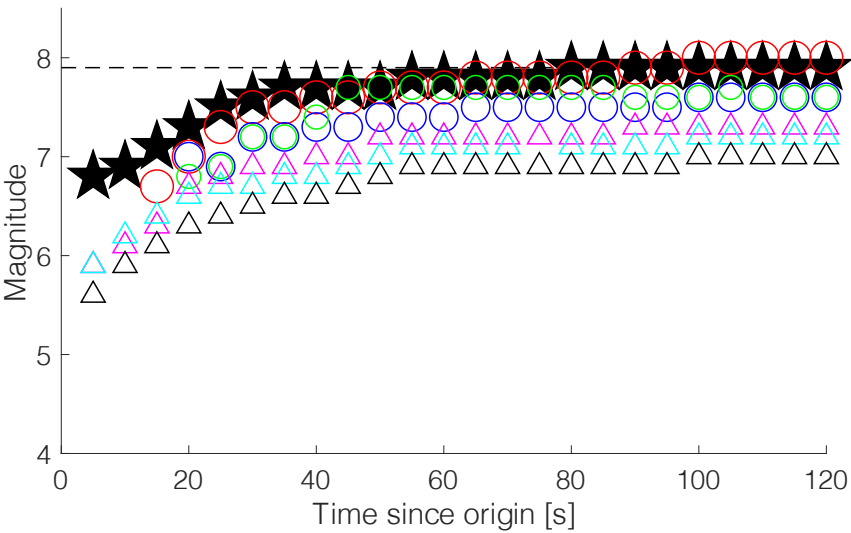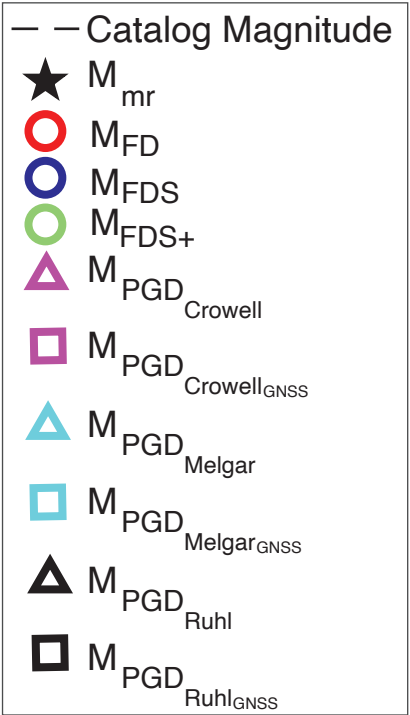

Supplement: Presentation_1.zip [file Presentation_1.zip]

a) 2019 Ridgecrest, M 7.1

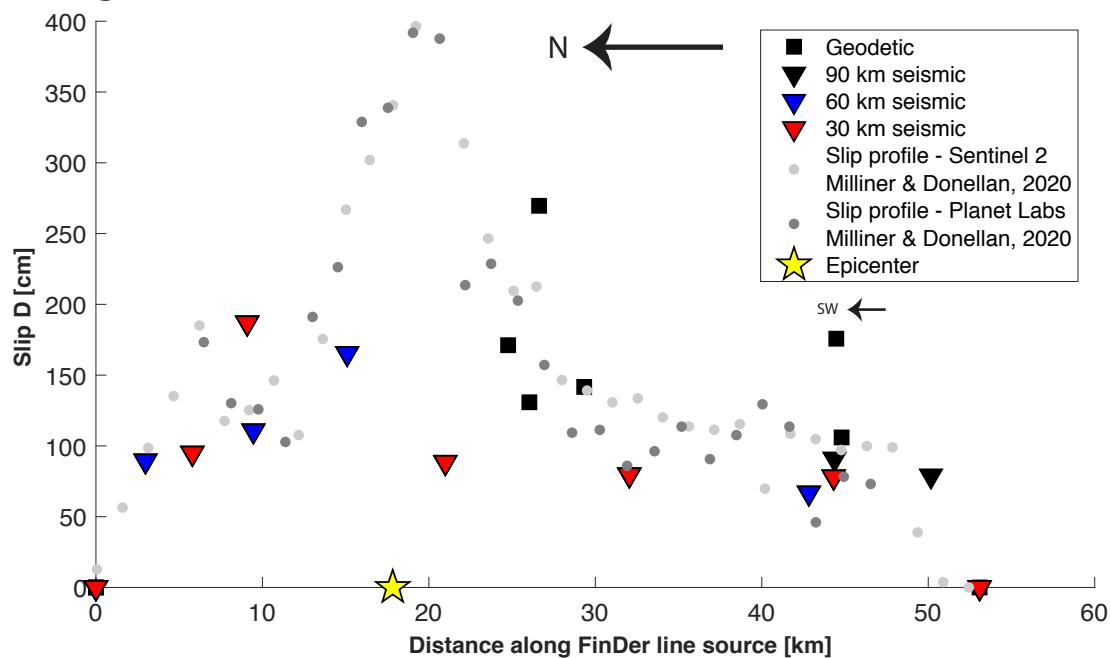

b) 2016 Kumamoto, M 7.0

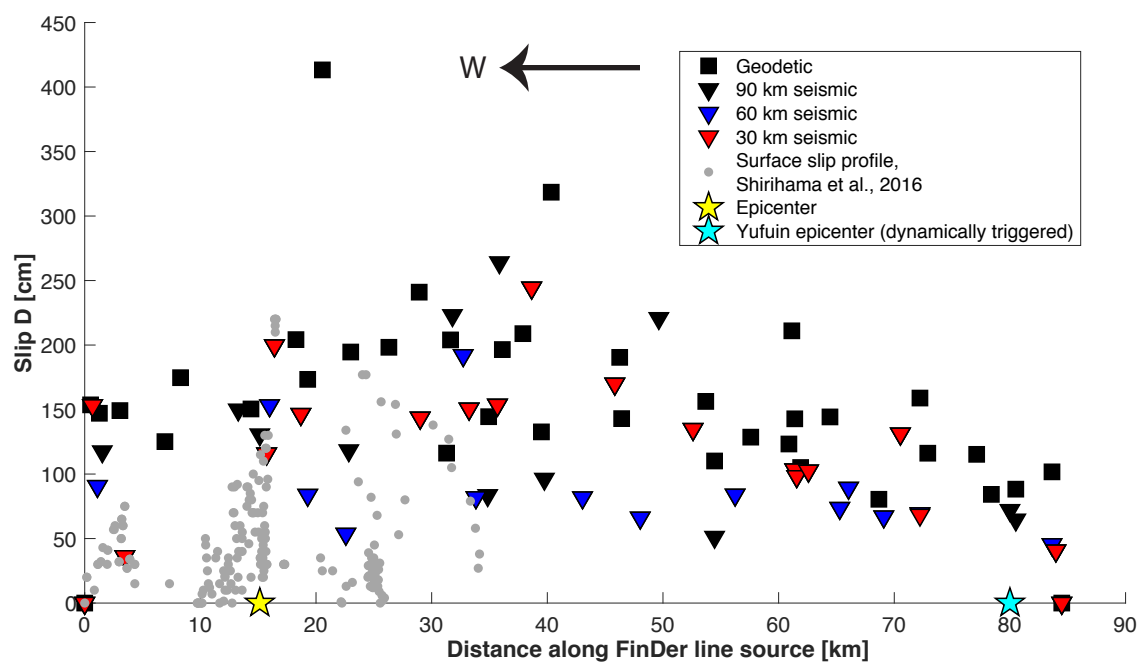

c) 2008 Wenchuan, M 7.9

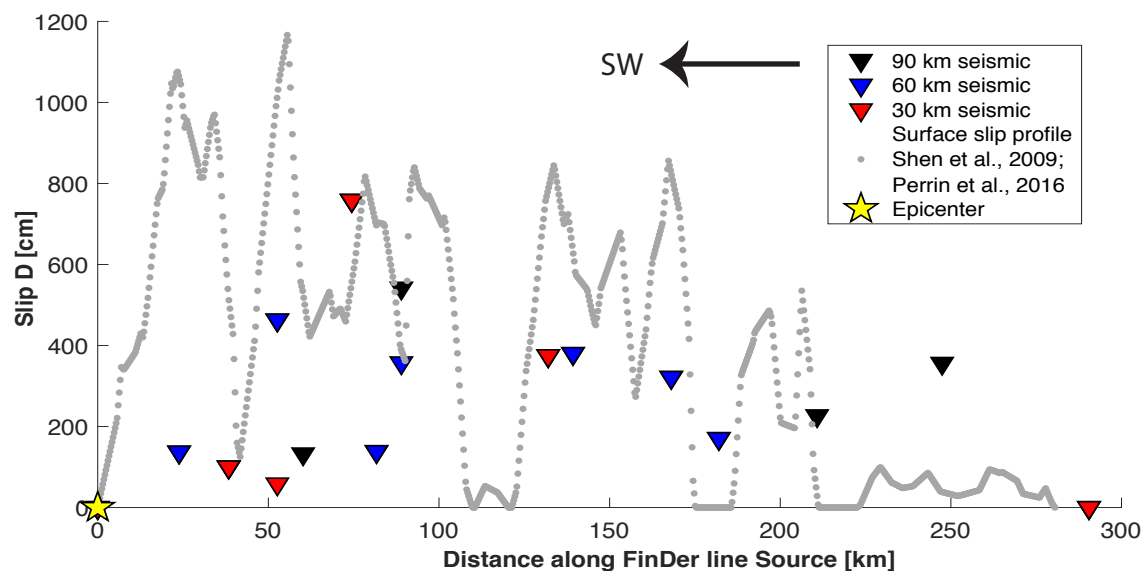

Supplement: Presentation_1.zip [file Presentation_1.zip]



10 s:  $M_{FD} 6.7$  |  $L_{FD} = 39$  km



15 s:  $M_{FD} 7$  |  $L_{FD} = 62$  km



20 s:  $M_{FD} 7.1$  |  $L_{FD} = 72$  km



25 s:  $M_{FD} 7.2$  |  $L_{FD} = 84$  km



Supplement: Presentation_1.zip [file Presentation_1.zip]

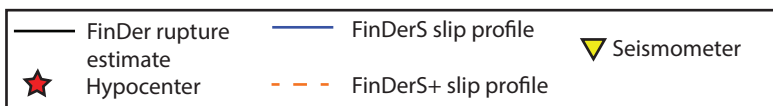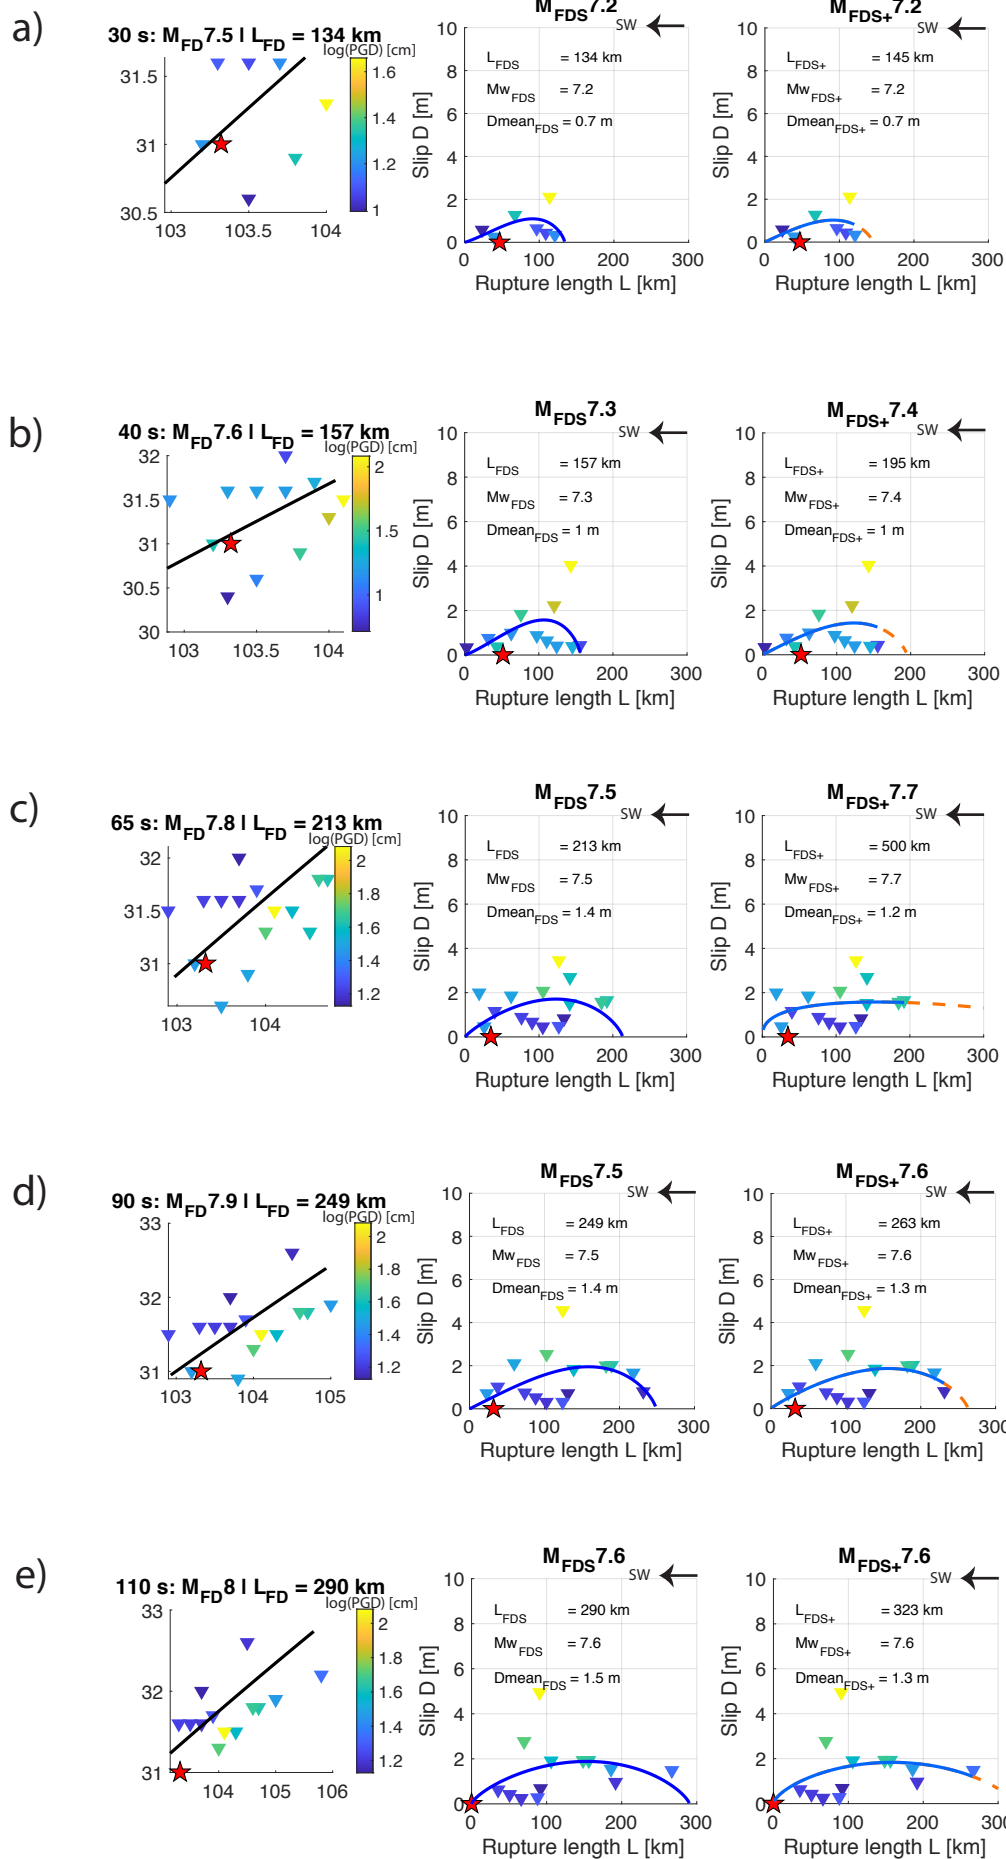

Supplement: Presentation_1.zip [file Presentation_1.zip]

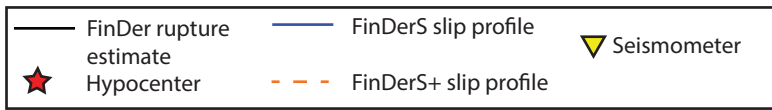

40 s:  $M_{FD} 7.6$  |  $L_{FD} = 157$  km

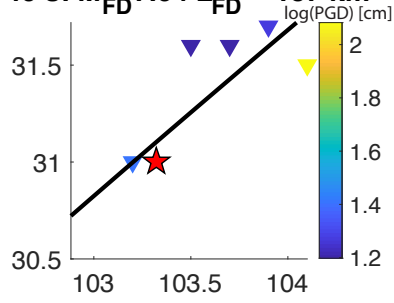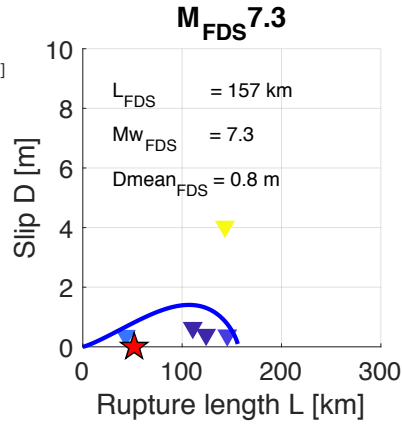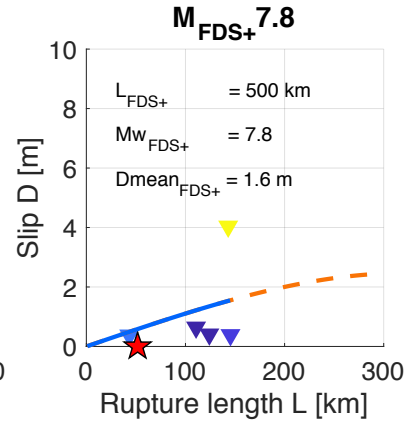

65 s:  $M_{FD} 7.8$  |  $L_{FD} = 213$  km

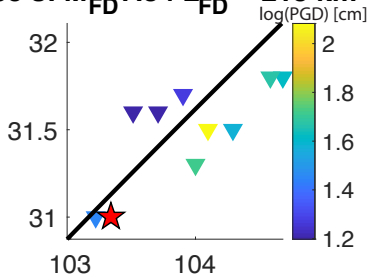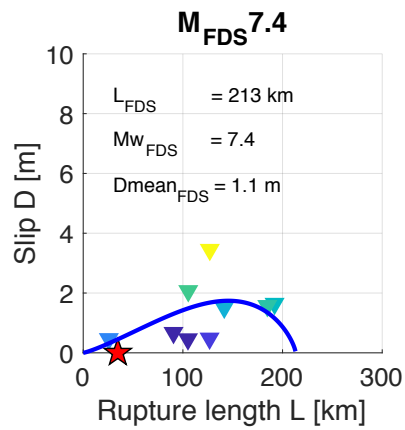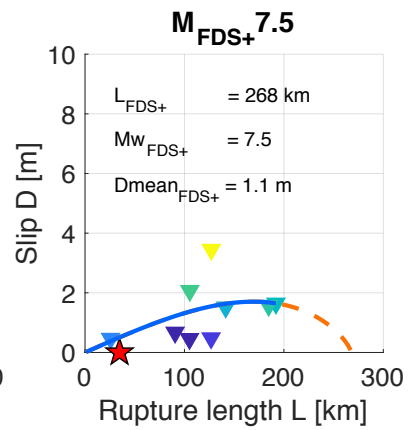

90 s:  $M_{FD} 7.9$  |  $L_{FD} = 249$  km

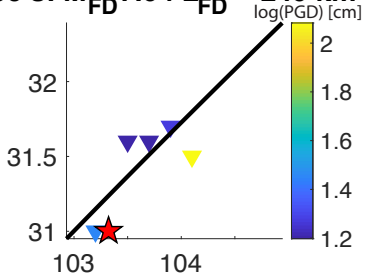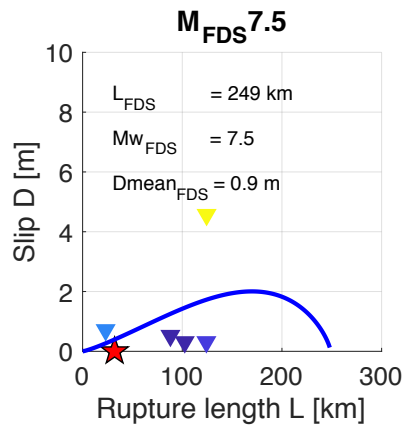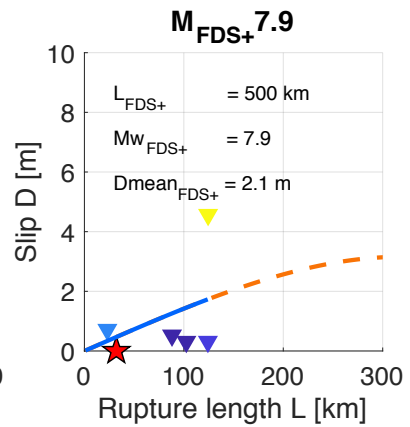

110 s:  $M_{FD} 8$  |  $L_{FD} = 290$  km

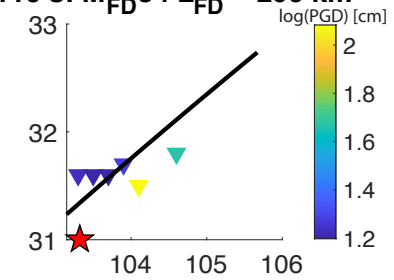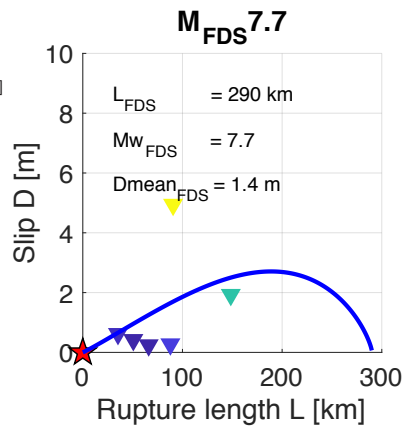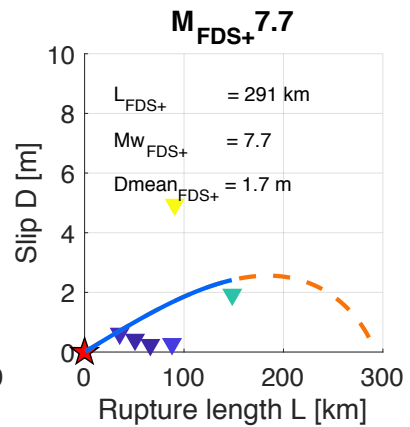

Supplement: Presentation_1.zip [file Presentation_1.zip]
